# CRK2 and C-terminal phosphorylation of NADPH oxidase RBOHD regulate ROS production in Arabidopsis

**Running title: CRK2 in plant immune signaling**

**Key words:** Cysteine-rich receptor-like kinase, reactive oxygen species, NADPH oxidase, phosphorylation, Arabidopsis

Sachie Kimura<sup>1</sup>, Kerri Hunter<sup>1</sup>, Lauri Vaahtera<sup>2</sup>, Huy Cuong Tran<sup>1#</sup>, Aleksia Vaattovaara<sup>1</sup>, Anne Rokka<sup>3</sup>, Sara Christina Stolze<sup>4</sup>, Anne Harzen<sup>4</sup>, Lena Meißner<sup>1§</sup>, Maya Wilkens<sup>1§</sup>, Thorsten Hamann<sup>2</sup>, Masatsugu Toyota<sup>5,6</sup>, Hirofumi Nakagami<sup>4</sup>, Michael Wrzaczek<sup>1\*</sup>

<sup>1</sup>Organismal and Evolutionary Biology Research Programme, Viikki Plant Science Centre, Faculty of Biological and Environmental Sciences, University of Helsinki, Helsinki, FI-00014, Finland.

<sup>2</sup>Department of Biology, Norwegian University of Science and Technology, 7491 Trondheim, Norway.

<sup>3</sup>Turku Centre for Biotechnology, University of Turku and Åbo Akademi, FI-20520, Finland.

<sup>4</sup>Protein Mass Spectrometry Group, Max-Planck Institute for Plant Breeding Research, Carl-von-Linné-Weg 10, D-50829 Cologne, Germany.

<sup>5</sup>Department of Biochemistry and Molecular Biology, Saitama University, Saitama 338-8570, Japan.

<sup>6</sup>Department of Botany, University of Wisconsin, Madison, WI, 53593, USA.

<sup>#</sup>Present address: Department of Biology, Lund University, Sölvegatan 35, 223 62 Lund, Sweden.

<sup>§</sup>Present address: Technische Universität Braunschweig, Germany.

\* To whom correspondence should be addressed:

Michael Wrzaczek

Organismal and Evolutionary Biology Research Programme

Viikki Plant Science Centre, VIPS

Faculty of Biological and Environmental Sciences

Viikinkaari 1, PO Box 65

FIN-00014 Helsinki University

Finland

Email: michael.wrzaczek@helsinki.fi

Phone: +358 2941 57 773

ORCID IDs: 0000-0001-5736-2123 (SK), 0000-0002-2285-6999 (KH), 0000-0003-4733-4430 (LV), 0000-0002-7670-2215 (CT), 0000-0003-3452-0947 (AV), 0000-0003-1482-9154 (AR), 0000-0002-1421-9703 (SCR), 0000-0002-8605-6026 (LM), 0000-0003-4631-6177 (MWi), 0000-0001-8460-5151 (TH), 0000-0002-9544-0978 (MT), 0000-0003-2569-7062 (HN), 0000-0002-5946-9060 (MW<sub>r</sub>)

40 **Abstract**

41 Reactive oxygen species (ROS) are important messengers in eukaryotic organisms and their production is  
42 tightly controlled. Active extracellular ROS production by NADPH oxidases in plants is triggered by  
43 receptor-like protein kinase (RLK)-dependent signaling networks. Here we show that the cysteine-rich RLK  
44 CRK2 kinase activity is required for plant growth and CRK2 exists in a preformed complex with the  
45 NADPH oxidase RBOHD in Arabidopsis. Functional CRK2 is required for the full elicitor-induced ROS  
46 burst and consequently the *crk2* mutant is impaired in defense against the bacterial pathogen *Pseudomonas*  
47 *syringae* pv. tomato DC3000. Our work demonstrates that CRK2 regulates plant innate immunity. We  
48 identified *in vitro* CRK2-dependent phosphorylation sites in the C-terminal region of RBOHD.  
49 Phosphorylation of S703 RBOHD is enhanced upon flg22 treatment and substitution of S703 with alanine  
50 reduced ROS production in Arabidopsis. Phylogenetic analysis suggests that phospho-sites in C-terminal  
51 region of RBOHD are conserved throughout the plant lineage and between animals and plants. We propose  
52 that regulation of NADPH oxidase activity by phosphorylation of the C-terminal region might be an ancient  
53 mechanism.

## 54 **Introduction**

55 Plants are continuously confronted with stimuli from the surrounding environment, including abiotic cues  
56 and invading pathogens. Plant cells also perceive a plethora of signals from neighboring cells and distant  
57 tissues. Numerous plasma membrane proteins are involved in the meticulous monitoring and transduction of  
58 signals for inter- and intracellular communication. A common early feature of many cellular responses to  
59 various environmental changes involves the production of reactive oxygen species (ROS) (Kimura et al.,  
60 2017; Waszczak et al., 2018). While ROS are an inevitable by-product of aerobic metabolism their  
61 unrestricted accumulation can have deleterious consequences (Waszczak et al., 2018), ROS are also  
62 ubiquitous signaling molecules in plants and animals alike (Suzuki et al., 2011; Waszczak et al., 2018).  
63 Eukaryotic cells produce ROS in several subcellular compartments as well as the extracellular space, in  
64 plants referred to as apoplast (Kimura et al., 2017; Waszczak et al., 2018). A major component in the  
65 production of extracellular ROS is the evolutionarily conserved NADPH oxidase (NOX) family (Kimura et  
66 al., 2017; Meitzler et al., 2014). NOX-dependent ROS production is involved in regulation of immune  
67 functions, cell growth and apoptosis in animals and plants (Jiménez-Quesada et al., 2016; Waszczak et al.,  
68 2018).

69 Plant NOXs, referred to as respiratory burst oxidase homologs (RBOHs), have been identified as homologs  
70 of phagocyte gp91<sup>phox</sup>/NOX2, which contains six transmembrane helices and a C-terminal NADPH- and  
71 FAD-binding cytoplasmic region (Torres et al., 2002). Unlike gp91<sup>phox</sup>/NOX2, RBOHs contains an  
72 additional N-terminal region with Ca<sup>2+</sup>-binding EF-hands, similar to non-phagocytic NOXs, such as NOX5  
73 (Suzuki et al., 2011). RBOH activity is strictly controlled to avoid damaging consequences of unrestricted  
74 ROS production (Suzuki et al., 2011). *Arabidopsis thaliana* (Arabidopsis) RBOHD is the best-characterized  
75 RBOH and is involved in biotic and abiotic stress responses (Lee et al., 2013; Lee et al., 2018; Torres et al.,  
76 2002). The N-terminal region of RBOHD is phosphorylated by a variety of protein kinases, including  
77 receptor-like cytoplasmic kinases (RLCKs; Dubiella et al., 2013; Han et al., 2019; Kadota et al., 2014; Kaya,  
78 Takeda et al., 2018; Kimura et al., 2012; Li et al., 2014; Ogasawara et al., 2008; Zhang et al., 2018), for  
79 example BOTRYTIS-INDUCED KINASE 1 (BIK1; (Kadota et al., 2014; Li et al., 2014). While previous  
80 research has suggested a predominant role of phosphorylation of the N-terminal region for regulation of  
81 RBOH, phosphorylation of the C-terminal region is important for the regulation of human gp91<sup>phox</sup>/NOX2  
82 and NOX5 (Jagnandan et al., 2007; Raad et al., 2009). NADPH- and FAD-binding sites in C-terminus are  
83 highly conserved in NOXs and RBOHs, but it is unclear whether the C-terminus of plant RBOHs could also  
84 be a target for regulation of the ROS producing activity.

85 Apoplastic RBOH-dependent ROS production is a common response to the activation of receptor-like  
86 protein kinase (RLK; Shiu & Bleecker, 2001) signaling, in particular following perception of microbe-  
87 associated molecular patterns (MAMPs) or damage-associated molecular patterns (DAMPs; Couto & Zipfel,  
88 2016; Kimura et al., 2017). However, the role of the so-called ROS burst and its integration into RLK-

89 triggered signaling networks are as yet unclear (Kimura et al., 2017). A large group of RLKs in plants is  
90 formed by the cysteine-rich RLKs (CRKs; Vaattovaara et al., 2019). The extracellular region of CRKs  
91 harbors two copies of the domain of unknown function 26 (DUF26) but the molecular function of the CRK  
92 ectodomain remains unknown (Vaattovaara et al., 2019). CRKs have been linked to ROS signaling (Bourdais  
93 et al., 2015; Idänheimo et al., 2014; Yadeta et al., 2017; Yeh et al., 2015) and cell death (Bourdais et al.,  
94 2015; Yadeta et al., 2017) and are important signaling elements in plant development, biotic and abiotic  
95 stress responses (Acharya et al., 2007; Bourdais et al., 2015; Chen et al., 2004; Chern et al., 2016; Hunter et  
96 al., 2019; Idänheimo et al., 2014; Tanaka et al., 2012; Wrzaczek et al., 2010; Yadeta et al., 2017; Yeh et al.,  
97 2015).

98 Here we characterize the role of CRK2 in immune signaling in response to MAMP-perception. CRK2 exists  
99 in a pre-formed complex with RBOHD. CRK2 controls the activity of RBOHD and functional CRK2 is  
100 required for full MAMP-induced ROS production. Importantly, we show that CRK2 phosphorylates the C-  
101 terminal region of RBOHD and modulates the ROS-production activity of RBOHD *in vivo*. Our results lead  
102 us to propose a novel mechanism for the regulation of RBOHD activity through phosphorylation of the C-  
103 terminal region and highlight a critical role for CRK2 in the precise control of the ROS burst in response to  
104 biotic stress.

## 105 **Results**

### 106 **CRK2 kinase activity is important for plant development**

107 CRK2 has been previously implicated in stress responses and development in Arabidopsis (Bourdais et al.,  
108 2015). CRK2 is a typical CRK with N-terminal signal peptide, extracellular region containing two DUF26  
109 domains, transmembrane region and intracellular protein kinase domain (Fig. 1a). The *crk2* mutant was  
110 smaller than wild type (Col-0) plants (Fig. 1b; Bourdais et al., 2015), and displayed significantly reduced  
111 fresh (Fig. 1c) and dry weight (Fig. S1a). Over-accumulation of the plant hormone salicylic acid (SA) often  
112 causes a reduction of plant size, but SA levels were not significantly different between *crk2* and wild type  
113 plants (Fig. S1b). Expression of YFP-tagged CRK2 under the control of the CRK2 promoter  
114 (*CRK2pro::CRK2-YFP*) in the *crk2* background restored plant growth (Figs. 1b, 1c and S1a). Substitution of  
115 the ATP-binding lysine (K) at position 353 with glutamic acid (E; CRK2<sup>K353E</sup>) or the aspartic acid (D) at  
116 position 450 in the catalytic domain VIb (Stone & Walker, 1995) with asparagine (N; CRK2<sup>D450N</sup>) abated the  
117 kinase activity of CRK2 *in vitro* (Hunter et al., 2019). Kinase dead CRK2<sup>K353E</sup>-YFP or CRK2<sup>D450N</sup>-YFP  
118 under control of the *CRK2* promoter displayed the same subcellular localization as wild type CRK2-YFP  
119 (Figs. S1c) but failed to restore the growth defect of *crk2* (Figs. 1b, 1c and S1a). In summary, our results  
120 show that CRK2 is important for proper plant growth and its kinase activity is crucial for this function.

### 121 **CRK2 is required for MAMP-triggered responses and resistance to *Pseudomonas syringae* pv. tomato 122 DC3000**

123 Previous results suggested that ROS production triggered by flg22, a MAMP derived from bacterial flagella,  
124 is reduced in *crk2* (Bourdais et al., 2015). Therefore, we tested the role of CRK2 in MAMP-induced ROS  
125 production in detail. ROS production triggered by flg22 was reduced in *crk2* and reintroduction of CRK2-  
126 YFP into the mutant background restored ROS production to the same levels as in Col-0 (Fig. 2a). The  
127 flg22-induced ROS production in plants expressing CRK2<sup>D450N</sup>-YFP was comparable to *crk2* (Fig. 2b).  
128 Transcriptional upregulation of flg22 responsive genes (*FRK1* and *NHL10*) showed that MAMP-perception  
129 was not impaired in *crk2* (Figs. S2a and S2b). To test whether the reduced response of *crk2* to flg22 was  
130 accompanied by altered pathogen susceptibility, we measured growth of the hemibiotrophic bacterial  
131 pathogen *Pseudomonas syringae* DC3000 pv. tomato (*Pto* DC3000). The *crk2* mutant was significantly more  
132 susceptible to the virulent pathogen compared to Col-0 (Fig. 2c). CRK2-YFP but not the kinase-dead  
133 CRK2<sup>D450N</sup>-YFP restored the pathogen susceptibility of *crk2* (Fig. 2c). ROS production induced by chitin  
134 (Fig. S2c) or pep1 (Fig. S2d) was also reduced in *crk2* compared to Col-0 suggesting that the reduced  
135 MAMP- or DAMP-triggered ROS production in *crk2* is a general response and not specific to flg22.

136 To investigate the role of CRK2 in flg22-triggered responses in more detail, we assessed Ca<sup>2+</sup> signaling,  
137 MAPK activation and callose deposition in *crk2*. Application of flg22 resulted in a rapid increase in cytosolic  
138 Ca<sup>2+</sup> ([Ca<sup>2+</sup>]<sub>cyto</sub>) levels in wild type plants, which express the FRET-based Ca<sup>2+</sup>-sensor *YCNano-65* (Choi et  
139 al., 2014, Lenglet et al., 2017, Toyota et al., 2018). This response was strongly reduced in the *crk2* mutant  
140 background, *YCNano65/crk2* (Figs. S2e and S2f). Interestingly, flg22-dependent MAPK activation (Fig.

141 S2g) and callose deposition (Fig. S2h and S2i) were more pronounced in *crk2* compared to Col-0. Taken  
142 together, CRK2 is an essential component for mounting immune responses against the virulent bacterial  
143 pathogen in Arabidopsis, modulating extracellular ROS production, callose deposition, Ca<sup>2+</sup> influx and  
144 MAPK activation.

#### 145 **CRK2 interacts with RBOHD and controls ROS production**

146 RBOHD is the main source of MAMP/DAMP-induced extracellular ROS production (Couto & Zipfel, 2016;  
147 Kimura et al., 2017) and *flg22*-, *pep1* and chitin-induced ROS production was significantly reduced in *crk2*  
148 (Figs. 2 and S2). RBOH proteins, including RBOHD, are synergistically activated by protein  
149 phosphorylation and Ca<sup>2+</sup>-binding to EF-hand motifs in the N-terminal region (Kaya et al., 2018). Given the  
150 importance of the kinase activity of CRK2 in MAMP-induced ROS production we investigated whether  
151 CRK2 could activate RBOHD. To test this, we used human embryonic kidney 293T (HEK293T) cells, a  
152 human cell culture which produces minimal amounts of extracellular ROS due to a lack of expression of  
153 endogenous NADPH oxidases (Ogasawara et al., 2008). HEK293T cells were co-transfected with *3FLAG-*  
154 *RBOHD* and *CRK2-3Myc* or *3Myc-GFP* as control. Subsequently, RBOHD-mediated extracellular ROS  
155 production was measured by luminol-amplified chemiluminescence. Despite equal *3FLAG-RBOHD* protein  
156 levels (Fig. S3a) ROS production in cells co-transfected with *CRK2-3Myc* and *3FLAG-RBOHD* was strongly  
157 elevated compared to cells co-transfected with *3FLAG-RBOHD* and *3Myc-GFP* (Fig. 3a). Co-transfection  
158 with the inactive variant *CRK2<sup>D450N</sup>-3Myc* did not enhance ROS production by *3FLAG-RBOHD* compared to  
159 co-transfection with *CRK2-3Myc* (Fig. 3a). Transfection of *CRK2-3Myc* in the absence of *3FLAG-RBOHD*  
160 did not induce ROS production in HEK293T cells (Fig. 3a). Since RBOHD can also be activated by Ca<sup>2+</sup>,  
161 HEK293T cells were treated with ionomycin, a Ca<sup>2+</sup> ionophore that induces a rise in cytosolic Ca<sup>2+</sup> levels.  
162 Ionomycin-induced transient ROS production ( $\Delta_{\text{delta}} \text{ROS}$ : ROS<sub>T=30</sub> to ROS<sub>T=31</sub>) in *CRK2-3Myc* and *3FLAG-*  
163 *RBOHD* co-transfected cells was not different from *3Myc-GFP* and *3FLAG-RBOHD* co-transfected cells  
164 (Fig. 3a). Enhancement of RBOHD activity by CRK2 was not dependent on Ca<sup>2+</sup> influx as the elevated basal  
165 ROS production activity of RBOHD co-transfected with *CRK2-3Myc* (ROS<sub>T=0</sub> to ROS<sub>T=30</sub> in Fig. 3a) was  
166 also observed when using Ca<sup>2+</sup>-free assay buffer (Figs. S3b and S3c). These results suggest that *CRK2-3Myc*  
167 enhanced the basal ROS-producing activity of *3FLAG-RBOHD* in HEK293T cells uncoupling it from Ca<sup>2+</sup>  
168 dependence.

169 The Arabidopsis genome encodes 10 *RBOHs* (Kaya et al., 2018). To test whether CRK2 specifically  
170 activates RBOHD, *CRK2-3Myc* was co-transfected with RBOHF and RBOHC into HEK293T cells. *CRK2-*  
171 *3Myc* enhanced basal ROS-producing activity of RBOHC and RBOHF in HEK293T cells similarly to  
172 RBOHD (Figs. S3d-S3g). However, while the basal ROS production activity (ROS<sub>T=5</sub>) of RBOHD and F  
173 was elevated approximately 10fold, the basal activity of RBOHC was only elevated 3fold.

174 To investigate whether CRK2 and RBOHD interact *in planta*, we performed co-immunoprecipitation (Co-IP)  
175 assays using *rbohD* plants expressing *35S::CRK2-YFP* and *35S::FLAG-RBOHD*. *CRK2-YFP* was

176 immunoprecipitated using an anti-GFP antibody coupled to magnetic beads and co-purified RBOHD was  
177 detected using a RBOHD-specific antibody. RBOHD co-purified with CRK2 (Fig. 3b) and treatment of  
178 plants with flg22 did not alter the interaction of CRK2 with RBOHD (Fig. 3c). To analyze this interaction in  
179 more detail, we carried out *in vitro* interaction assays between the cytosolic region of CRK2 (Fig. 1a) and the  
180 cytosolic N-terminal and C-terminal regions of RBOHD (Fig. 3d). Recombinant RBOHD/N or RBOHD/C  
181 tagged with 6His and maltose-binding protein (MBP; 6His-MBP-RBOHD/N, 6His-MBP-RBOHD/C) or  
182 MBP were incubated with the cytosolic region of CRK2, which contains the kinase domain (CRK2<sub>cyto</sub>)  
183 tagged with 6His and glutathione S-transferase (GST; 6His-GST-CRK2<sub>cyto</sub>) and glutathione sepharose  
184 beads. GST pull-down assay showed that 6His-GST-CRK2<sub>cyto</sub> interacted *in vitro* with 6His-MBP-  
185 RBOHD/N but intriguingly also with 6His-MBP-RBOHD/C (Fig. 3e). In summary, our results suggest that  
186 CRK2 is capable of direct interaction with RBOHD. CRK2 and RBOHD form a complex which exists  
187 independent of flg22 perception *in planta*, in contrast to many other RLK-containing complexes which are  
188 formed in response to ligand-binding.

### 189 **CRK2 phosphorylates RBOHD *in vitro***

190 The kinase activity of CRK2 was essential for the full flg22-triggered ROS burst *in planta* as well as for  
191 enhancing ROS production by RBOHD in HEK293T cells. Therefore, we tested whether CRK2 could  
192 phosphorylate RBOHD *in vitro*. Recombinant 6His-GST-CRK2<sub>cyto</sub> and 6His-MBP tagged RBOHD  
193 cytosolic regions (Figs. 1a and 3d) were produced in *E. coli* and affinity purified. The 6His-GST-CRK2<sub>cyto</sub>  
194 phosphorylated 6His-MBP-RBOHD/N but not MBP (Fig. 4a). Because of the similar molecular weight of  
195 6His-GST-CRK2<sub>cyto</sub> (68.5 kDa) and 6His-MBP-RBOHD/C (78.4 kDa), RBOHD/C was divided into three  
196 overlapping fragments (C1, C2, and C3; Fig. 3d). The results showed that the C1 and C3 fragments of 6His-  
197 MBP-RBOHD were preferentially phosphorylated by 6His-GST-CRK2<sub>cyto</sub> while C2 displayed considerably  
198 weaker phosphorylation (Fig. 4b). Mass spectrometric analysis of in-gel trypsin- or Lys-C-digested peptides  
199 identified *in vitro* RBOHD phosphorylation sites targeted by CRK2<sub>cyto</sub> (Table S1). In the N-terminal region  
200 of RBOHD two sites targeted by CRK2 were identified (S8 and S39), while three sites (S611, S703, S862)  
201 were identified in the C-terminal region. Taken together our results show that the N- and C-terminal regions  
202 of RBOHD are phosphorylated by CRK2 *in vitro*.

### 203 **CRK2 regulates RBOHD *via* phosphorylation of S703 and S862**

204 Among the RBOHD phospho-sites targeted by CRK2 *in vitro*, phosphorylation of S8 and S39 has been  
205 previously described to be phosphorylated by SIK1 (Zhang et al., 2018) and BIK1 (Kadota et al., 2014, Li et  
206 al., 2014). S703 has been reported to be phosphorylated upon xylanase treatment but no responsible kinase  
207 was identified (Benschop et al., 2007) while phosphorylation of S611 and S862 has not been described so far.  
208 In order to test whether the identified phospho-sites in RBOHD were important for the regulation of RBOHD  
209 activity, the residues S8, S39, S611, S703, and S862 were substituted with alanine to make them non-  
210 phosphorylatable. Wild type RBOHD and phospho-site mutant constructs were transfected into HEK293T  
211 cells together with CRK2. Amino acid substitutions did not affect RBOHD protein levels (Fig. S4a and S4b).



212 Substitution of S8 or S39 in the N-terminal cytoplasmic region of RBOHD did not impact ROS-producing  
213 activity compared to the wild type protein when co-transfected with CRK2 (Fig. 5a). The 3FLAG-  
214 RBOHD<sup>S703A</sup> and CRK2-3Myc co-transfected cells showed reduced basal ROS production as compared to  
215 3FLAG-RBOHD and CRK2-3Myc, (Fig. 5b), suggesting that S703 could be a positive regulatory site for  
216 RBOHD activity. In contrast to 3FLAG-RBOHD<sup>S703A</sup>, HEK293T cells expressing 3FLAG-RBOHD<sup>S862A</sup> and  
217 CRK2-3Myc exhibited higher basal ROS production compared to 3FLAG-RBOHD and CRK2-3Myc (Fig.  
218 5b), suggesting that S862 could act as a negative regulatory site. ROS production of 3FLAG-RBOHD<sup>S611A</sup>  
219 co-transfected with CRK2-3Myc was similar to 3FLAG-RBOHD suggesting no regulatory role of this single  
220 site. Mutation of S703 or S862 of RBOHD did not impair Ca<sup>2+</sup>-dependent activation of ROS production  
221 (Figs. S4c and S4d). Taken together, our results suggest that the phospho-sites in the C-terminal cytoplasmic  
222 region of RBOHD could be crucial for fine-tuning ROS production activity in HEK293T cells.

### 223 **Phosphorylation of S703 of RBOHD modulates flg22-induced ROS production *in planta***

224 To investigate whether RBOHD phosphorylation sites targeted by CRK2 *in vitro* were also phosphorylated  
225 upon flg22-treatment *in planta*, we carried out targeted phosphoproteomic analyses of Col-0 plants treated  
226 with flg22 for 5 min. Phosphorylation of S8 was not significantly induced by flg22-treatment (Fig. 6a, S5a  
227 and S5b) while S39 phosphorylation was strongly enhanced (Fig. 6b and S5c). Phosphorylation of S611 and  
228 S862 could not be evaluated as trypsin or Lys-C digestion resulted in phospho-site-containing peptides of  
229 inappropriate length for LC-MS-based targeted analyses. However, phosphorylation of S703, which was  
230 targeted by CRK2 *in vitro* and mutation to alanine reduced ROS production in HEK293T cells, was  
231 significantly enhanced upon flg22 treatment (Fig. 6c and Fig. S5d). In agreement with previous studies,  
232 phosphorylation of S163, S343, and S347 in RBOHD (Fig. S5e-S5g), as well as dual phosphorylation of the  
233 TEY-motif in the MAPKs MPK3, MPK6 and MPK11 (Fig. S5h-S5j), were enhanced by flg22-treatment  
234 (Kadota, Shirasu et al., 2015). (Kadota et al., 2015)

235 To investigate whether phosphorylation of S703 in the C-terminal region of RBOHD also impacts RBOHD-  
236 dependent ROS production *in planta*, we generated transgenic plants expressing RBOHD or RBOHD<sup>S703A</sup>  
237 under the control of the *RBOHD promoter* (*RBOHDpro::3FLAG-RBOHD*) in *rbohD* background. The  
238 phospho-site mutations did not alter growth or development compared to the 3FLAG-RBOHD expressing  
239 plants (Fig. S6a). Lines expressing similar amounts of 3FLAG-RBOHD or 3FLAG-RBOHD<sup>S703A</sup> (Fig. S6b).  
240 Compared with 3FLAG-RBOHD expression lines, flg22-triggered ROS production in 3FLAG-RBOHD<sup>S703A</sup>  
241 lines was significantly reduced (Figs. 6d and S6c). In summary, our results suggest that phosphorylation of  
242 S703 in the C-terminus of RBOHD is important for full flg22-triggered ROS production also *in planta*.

### 243 **C-terminal phosphorylation sites are conserved in plant and animal NADPH oxidases**

244 Since little is known about control of RBOH activity *via* its C-terminus we investigated whether regulation  
245 through S703 was unique to RBOHD or conserved also in other RBOHs. We constructed a phylogenetic tree  
246 of RBOHs from plant genomes representing major branches of the plant lineages (Fig. 7). Plant RBOHs



247 form a monophyletic group, which is separated from human NOX2 and NOX5. The phospho-sites in the C-  
248 terminal region displayed strong conservation throughout the plant RBOH clade. S703 was conserved in a  
249 monophyletic clade containing eight of the ten RBOHs from Arabidopsis but not in the clade containing  
250 RBOHH and RBOHJ (Fig. 7). The phospho-sites S611 as well as S862, which may be involved in negative  
251 regulation based on experiments in HEK293T cells (Fig. 5b), were strongly conserved in all plant RBOHs.  
252 The sequence motifs harboring S611 and S862 are intriguingly conserved even in human NOX2 and NOX5  
253 (Fig. 7). The C-terminal region binds FAD and NADPH. Therefore it may underlie strong evolutionary  
254 constraints to conserve these binding properties. This may be also reflected in the strong conservation of C-  
255 terminal phospho-sites and their sequence context not only among plant NADPH oxidases but also animal  
256 NOX.

257 **Discussion**

258 CRKs are a large group of RLKs involved in biotic and abiotic stress signaling in Arabidopsis (Bourdais et  
259 al., 2015). We have previously shown that flg22-triggered extracellular ROS production is altered in several  
260 *crk* mutants (Bourdais et al., 2015). In particular CRK2, a member of the basal clade of CRKs (Vaattovaara  
261 et al., 2019), has been highlighted since *crk2* displays striking phenotypes (Bourdais et al., 2015) including  
262 reduced rosette size and reduced flg22-induced ROS production. Functional CRK2 restored the reduced  
263 rosette size (Fig. 1) as well as the MAMP-induced ROS burst (Fig. 2). In addition to their role in stress  
264 responses, extracellular ROS have also been implicated in leaf cell expansion (Schmidt et al., 2016), and the  
265 *rboh* *rboh* double mutant displays reduced rosette size (Torres et al., 2002). Overexpression of CRKs has  
266 been associated with increased SA accumulation (Acharya et al., 2007; Chen et al., 2004). However, since  
267 SA levels were unaltered in the loss-of-function mutant *crk2* (Fig. S1b), its smaller size may be a  
268 consequence of impaired ROS production (Fig. 2). This is supported by the observation that CRK2 enhanced  
269 the activity of RBOHD but also RBOHF in HEK293T cells (Fig. 3a and S3f). Alternatively, other substrates  
270 of CRK2 might be involved in the regulation of plant growth. In line with reduced MAMP- and DAMP-  
271 induced ROS production (Fig. 2a and 2b; Fig. S2c and S2d), *crk2* was more susceptible to the virulent  
272 bacterial pathogen *Pto* DC3000 (Fig. 2c) suggesting that CRK2-mediated ROS production was essential to  
273 effectively counter pathogen infection. Also other flg22-induced defense responses were altered in *crk2*  
274 including reduced changes in cytosolic Ca<sup>2+</sup> but enhanced callose deposition and MAPK activation (Fig.  
275 S2e-i). Ca<sup>2+</sup> is important for the activation of RBOH but ROS also triggers Ca<sup>2+</sup> fluxes in plants (Kimura et  
276 al., 2017). Thus, the diminished increase of cytosolic Ca<sup>2+</sup> in *crk2* may be a consequence of the impaired  
277 flg22-induced ROS production. Also, callose deposition (Caillaud et al., 2014; Ellinger & Voigt, 2014) has  
278 been previously linked to ROS production (Couto & Zipfel, 2016) and CRK2 interacts with callose synthases  
279 and phosphorylates CALLOSE SYNTHASE 1 (CALS1) *in vitro* (Hunter et al., 2019). However, unlike in  
280 the response to flg22, salt-induced callose deposition is reduced in *crk2* (Hunter et al., 2019) suggesting that  
281 CRK2 might regulate different callose synthases in response to biotic and abiotic stimuli. Interestingly,  
282 CRK2 forms clusters at the plasma membrane in response to flg22-treatment and ROS is required for this  
283 process (Hunter et al., 2019). It is not clear how these clusters are integrated with the regulation of RBOHD  
284 activity but it might serve to connect RBOHD-dependent ROS production with callose deposition. Another  
285 important element in response to biotic and abiotic cues is the activation of MAPK cascades (Bigéard et al.,  
286 2015; Boudsocq et al., 2015) and earlier reports suggest a bifurcation to ROS burst and MAPK activation in  
287 defense signaling following MAMP-perception (Yeh et al., 2016; Zhang et al., 2007). CRK2 could be  
288 involved in balancing MAMP-induced ROS signaling pathways and MAPK signaling but the mechanisms  
289 are still unclear. Thus, CRK2 likely participates in the control of ROS production *via* interaction with  
290 RBOHD rather than MAMP-receptor complexes. Intriguingly, CRK2 existed in a pre-formed complex with  
291 RBOHD *in planta* independent of MAMP-treatment (Fig. 3c) while many other RLK protein complexes are  
292 formed upon signal perception.

293 Phosphorylation of the C-terminus is critical for the regulation of human NADPH oxidases. Phosphorylation  
294 of the NOX2 C-terminus by protein kinase C (PKC) enhances assembly of the multimeric NOX2 complex  
295 and its activity, whereas phosphorylation by *ataxia telangiectasia*-mutated (ATM) kinase inhibits NOX2  
296 activity (Beaumel et al., 2017; Raad et al., 2009). NOX5 activity is regulated by Ca<sup>2+</sup>-binding to EF-hands in  
297 the N-terminus (Banfi et al., 2004) but NOX5 is also activated by phosphorylation of the C-terminus by  
298 PKC $\alpha$  or calcium/calmodulin-dependent kinase II (CAMKII; Chen et al., 2014; Pandey et al., 2011).  
299 Although the C-terminal catalytic domain of RBOHs is highly conserved in plants and animal, the N-  
300 terminus has been considered as important for activation of the ROS-production activity and multiple  
301 phospho-sites (S8, S39, S133, S148, S163, S339, S334 and S347) have been reported. Intriguingly,  
302 CRK2<sub>cyto</sub> interacted with and phosphorylated the RBOHD C-terminal region at S611, S703 and S862 (Fig.  
303 3e, 4b and Table S1). Phosphorylation of S703 upon xylanase treatment has been reported (Benschop et al.,  
304 2007) but not linked with other MAMPs or modulation of ROS production. Treatment of flg22 enhanced  
305 phosphorylation of S703 in Arabidopsis (Fig. 6c). Mutation S703A in RBOHD led to reduced CRK2-  
306 dependent RBOHD activity in HEK293T cells (Fig. 5b) and reduced flg22-induced ROS production in  
307 Arabidopsis (Fig. 6d). These results suggest that phosphorylation of the RBOHD C-terminus at S703 likely  
308 contributes to the regulation of MAMP-induced ROS production. Phosphorylation sites in the C-terminus  
309 were highly conserved among RBOHs (Fig. 7) suggesting that phosphorylation of the C-terminal region  
310 could be a general feature of plant NADPH oxidases. Remarkably, two putative RBOHD phospho-sites,  
311 S611 and S862, were identified even in the human NADPH oxidases NOX2 and NOX5 (Fig. 7). Substitution  
312 of RBOHD S862 to alanine resulted in enhanced ROS-producing activity in HEK293T cells. But substitution  
313 of RBOHD S611 to alanine, similarly to RBOHD S39A, did not alter ROS production in HEK293T cells  
314 (Fig. 5). RBOHD S39A also did not affect flg22-induced ROS production but phospho-mimic S39D  
315 enhanced the ROS production and phosphorylation of S39 is enhanced by MAMP treatment *in planta*  
316 (Kadota et al., 2014)(Fig. 6b, S5c). These results suggest the importance to determine the phosphorylation  
317 status of S611 and S862 *in planta*. RBOHD can also be regulated by cysteine S-nitrosylation in the C-  
318 terminus (Yun et al., 2011) but it is unclear how this modification is integrated with other regulatory  
319 mechanisms. Taken together, our results suggest that phosphorylation of the C-terminal region of plant  
320 NADPH oxidases is strongly conserved and important for controlling ROS production.

321 Several protein kinases phosphorylate RBOHD N-terminus and regulate the activity including RLCKs  
322 (Kadota et al., 2014; Li et al., 2014; Lin et al., 2015), MAP4Ks (Zhang et al., 2018), CPKs (Dubiella et al.,  
323 2013) and RLKs (Chen et al., 2017) but how is regulation by phosphorylation of the N- and C-terminal  
324 regions coordinated? BIK1 is a component involved in the activation of RBOHD by phosphorylation  
325 (Kadota et al., 2014; Li et al., 2014) and ROS production in *bik1* is reduced to a similar extent as in *crk2*.  
326 However, reduced flg22-induced ROS production in *crk2* was not due to lower *BIK1* transcript abundance  
327 (Fig. S7). BIK1 homologs, AvrPphB SUSCEPTIBLE1 (PBS1) and AvrPphB SUSCEPTIBLE1-LIKE (PBL)  
328 kinases, contribute to the regulation of RBOH activity and ROS production is progressively reduced in

329 double mutants with *bik1* (Lin et al., 2015; Zhang et al., 2018). CRK2 and BIK1 could synergistically  
330 regulate ROS production but we were unable to obtain a double mutant between *bik1* and *crk2* (Table S2).  
331 Therefore, we propose that at least one of these components is essentially required. BIK1 has previously  
332 been shown to interact with other kinases including CRKs (Lee, 2017) but interaction with CRK2 has not  
333 been investigated. BIK1 and CRK2 are likely highly coordinated in order to precisely control ROS  
334 production in response to environmental stimuli (Fig. 8). Like CRKs, RBOHs are involved in diverse  
335 processes in stress responses and also plant development and it is conceivable that different CRKs regulate  
336 the diverse set of RBOH proteins in various cellular contexts potentially *via* phosphorylation of the C-  
337 terminal region.

338 In summary, we propose that CRK2 is a central element in orchestrating the extracellular ROS burst and in  
339 mediating the balance between different defense responses. The full complexity and integration of the  
340 regulatory components controlling RBOH activity is still a topic of much speculation (Kimura et al. 2017).  
341 The diversity of regulators converging at RBOHs reflects the prominent role of apoplastic ROS in signal  
342 transduction while simultaneously strict control is required to circumnavigate oxidative damage. We suggest  
343 that RBOHD is regulated by phosphorylation of the C-terminal region to complement regulatory  
344 mechanisms targeting the N-terminus (Fig. 8). Based on the conservation of serine and threonine residues in  
345 the C-terminus of NADPH oxidases we propose that this mode of regulation could be evolutionarily  
346 conserved in plants and animals. In the future it will be interesting to investigate how CRK-mediated  
347 phosphorylation of the RBOH C-terminus is integrated in the diverse processes which incorporate  
348 extracellular ROS.

349 **Materials and methods**

350 **Plant Material and growth condition**

351 *Arabidopsis thaliana* plants used in this study include Col-0, *crk2* (Bourdais et al., 2015), *rbohD* (Torres et  
352 al., 2002), *fls2* (Zipfel et al., 2004), *bik1* (Veronese et al., 2006) and *35S::FLAG-RBOHD/rbohD* (Kadota et  
353 al., 2014). To generate *crk2/bik1* double mutant, *crk2* and *bik1* single mutant plants were crossed. F1, F2 and  
354 F3 progenies were analyzed by PCR. F2 and F3 seeds were obtained by self-pollination. Primers are listed in  
355 Table S3.

356 Seeds were sterilized by 70 % ethanol 2 % Triton X-100 for 5 min and washed 3 times with 99 % ethanol.  
357 Surface sterilized seeds were sown on 1x or ½ strength Murashige and Skoog (MS) medium containing 1 %  
358 sucrose and subsequently stratified for 2-4 days in the dark at 4 °C. Plants were grown in growth chambers  
359 (Panasonic, #MLR-352-PE) under 12 h light/12 h dark (22°C /18°C). After 10 days, seedlings were  
360 transferred to soil and grown in growth rooms under the following conditions: 12 h light/12 h dark (23 °C  
361 /19 °C), relative humidity 50-60 %, unless otherwise stated.

362 For SA measurements seedlings were grown in liquid culture as described (Denness et al., 2011) with minor  
363 modifications. 20 mg of seeds were sterilized by sequential incubation with 70 % ethanol and 50 % bleach  
364 on a rotating mixer for 10 min each and washed three times with sterile water. Seeds were then transferred  
365 into 250 mL Erlenmeyer flasks containing 125 mL ½ strength MS medium supplemented with 1 % sucrose.  
366 Seedlings were grown under long-day conditions (16 h light /8 h dark, 22 °C/18 °C) at 150  $\mu\text{mol m}^{-2} \text{s}^{-1}$   
367 photon flux density on an IKA KS501 flask shaker at a constant speed of 130 rotations per minute. Seedlings  
368 were collected after 6 days of growth.

369 **Cell culture and Transfection**

370 HEK293T cells (ATCC, #CRL-3216) were maintained at 37 °C in 5 % CO<sub>2</sub> in Dulbecco's Modified Eagle's  
371 Medium nutrient mixture Ham's F-12 (SIGMA, #D8062) supplemented with 10 % fetal bovine serum  
372 (Gibco, #26140-079). Cells were transfected with *pcDNA3.1* and *pEF1* vectors using GeneJuice transfection  
373 reagent (Merck Millipore, #70967-3) according to the manufacturer's instructions.

374 **Plasmid construction**

375 *CRK2* and *RBOHD* constructs for *Arabidopsis* were generated through MultiSite Gateway technology  
376 (Invitrogen). To generate pBm43GW-CRK2pro::CRK2-Venus (YFP)-3AT for *crk2* complementation lines,  
377 the coding region of *CRK2* or kinase-dead mutants (K353E or D450N) were recombined into pENTR/D-  
378 TOPO vector (Invitrogen). pDONRP4P1R/zeo-CRK2pro, pDONR/zeo-CRK2 (or pENTR/D-TOPO-CRK2  
379 kinase-dead mutant) and p2R3a-VenusYFP-3AT were recombined with pBm43GW. To generate  
380 pHm43GW-pRBOHD::3FLAG-RBOHD-nosT, the coding region of 3FLAG-RBOHD was amplified by  
381 PCR from pcDNA3.1-3FLAG-RBOHD and cloned into pDONR/zeo vector (Invitrogen). The promoter  
382 region of *RBOHD* was amplified by PCR from pBin19g-pRBOHD::3FLAG-RBOHD and cloned into

383 pDONRP4P1R/zeo vector (Invitrogen). pDONRP4P1R/zeo-RBOHDpro, pDONR/zeo-3FLAG-RBOHD and  
384 p2R3a-nosT were recombined with pHm43GW. Single amino acid substitution mutants of *CRK2* and  
385 *RBOHD* were generated by point-mutant primers and the mega-primer PCR method. pBm43GW-  
386 CRK2pro::CRK2-YFP-3AT and pHm43GW-pRBOHD::3FLAG-RBOHD-nosT constructs were transformed  
387 into *crk2* and *rbohD* plants, respectively, by *Agrobacterium tumefaciens* strain GV3101 (pSoup)-mediated  
388 floral dipping (Clough & Bent, 1998). To generate *CRK2* over-expression lines for co-immunoprecipitation,  
389 pBm43GW-35S::CRK2-YFP-3AT were transformed into Col-0. p2R3a-Venus(YFP)-3AT, p2R3a-nosT,  
390 pBm43GW and pHm43GW (Siligato et al., 2016), pBin19g-pRBOHD::3FLAG-RBOHD (Kadota et al.,  
391 2014), pcDNA3.1-3FLAG-RBOHD (Kaya et al., 2018), pDONR/zeo-CRK2, pBm43GW-35S::CRK2-YFP-  
392 3AT and pDONRP4P1R/zeo-CRK2pro (Hunter et al., 2019) have been described previously.

393 6His-GST-CRK2cyto and 6His-MBP-RBOHD/C constructs for recombinant proteins were generated by  
394 using In-Fusion technology (Clontech). The coding regions of CRK2cyto (WT, K353E, and D450N),  
395 RBOHD/C (full-length, C1, C2, and C3) were amplified by PCR and cloned into pOPINK (Addgene,  
396 #41143) or pOPINM (Addgene, #26044) vectors. pOPINM-RBOHD/N was described previously (Kadota et  
397 al., 2014).

398 For HEK293T cell experiments, pEF1-MCS-3Myc [*Bam*HI-*Not*I-3Myc-stop fragment was inserted between  
399 *Kpn*I and *Xba*I sites of pEF1/myc-His B vector (Invitrogen)] was generated. To generate pEF1-CRK2 (WT  
400 or D450N)-3Myc, the codon optimized coding sequence of Kozak-CRK2 (WT or D450N) was cloned  
401 between *Bam*HI and *Not*I sites of pEF1-MCS-3Myc. To generate pcDNA3.1-3FLAG-RBOHD mutant  
402 constructs, the coding regions of RBOHD (S8A, S39A, S611A, S703A, or S862A) were cloned into *Bam*HI  
403 site of pcDNA3.1-3FLAG-MCS [Kozak-3FLAG-*Bam*HI-EcoRV-stop fragment was inserted between *Nhe*I  
404 and *Kpn*I sites of pcDNA3.1(-) vector (Invitrogen)]. Amino acid substituted mutants of CRK2 and RBOHD  
405 were generated by point-mutant primers and the mega-primer PCR method. pEF1-3Myc-GFP (Kawarazaki,  
406 Kimura et al., 2013), pcDNA3.1-3FLAG-RBOHD, pcDNA3.1-3FLAG-RBOHC, pcDNA3.1-3FLAG-  
407 RBOHF and pcDNA3.1-3FLAG-MCS were described previously (Kaya et al., 2018). Primer sequences are  
408 listed in the Table S3.

#### 409 **Subcellular protein localization**

410 Fluorescent images were obtained using a Leica TCS SP5 II HCS confocal microscope. For investigation of  
411 CRK2-YFP localization, 514 nm excitation and 525-590 nm detection range were used.

#### 412 **ROS measurements**

413 Leaf discs were collected using a cork borer from 4-week-old *Arabidopsis* plants and floated overnight in  
414 sterile distilled water in 96 well plates under continuous light at room temperature. On the following day,  
415 water was replaced with assay buffer containing 34 mg/L luminol sodium salt (Sigma, #A4685), 20 mg/L  
416 horse radish peroxidase (Fujifilm Wako, #169-10791), 200 nM flg22 (GenScript), 200 µg/mL Chitin (Sigma,



417 #C9752) or 1  $\mu$ M AtPep1 (ATKVKAKQRGKEKVSSGRPGQHN: synthesized by Synpeptide, China).  
418 Luminescence was measured for 1 sec every 1 min at room temperature using GloMax-Multi+Detection  
419 System (Promega). ROS production was expressed in relative luminescence units (RLU).

420 The ROS producing activity of RBOHs in HEK293T cells was measured as described previously (Kimura et  
421 al., 2012). Two days after transfection, medium was removed and cells were gently washed with 1xHBSS  
422 (GIBCO, #14025-092 or #14175-095). Measurements were started after addition of the assay buffer  
423 containing 250  $\mu$ M luminol sodium salt and 66.7 mg/L horse radish peroxidase. After 30 min measurement,  
424 1 $\mu$ M ionomycin (Calbiochem, #407952) was added. Chemiluminescence was measured for 1 sec every 1  
425 min at 37 °C using GloMax-Multi+Detection System. ROS production was expressed in relative  
426 luminescence units (RLU). Expressed proteins were detected by immunoblotting with anti-FLAG (Sigma,  
427 #F1804), anti-cMyc (Fujifilm Wako, #017-2187), anti- $\beta$ -actin (Sigma, #A5316) and IRDye800CW anti-  
428 mouse IgG (LI-COR, #926-32210) antibodies.

#### 429 **Bacterial growth assay**

430 To quantify bacterial growth on 4-week-old plants infected with the virulent *Pto*DC3000 (Whalen et al.,  
431 1991), growth curve assays were performed as described previously (Wrzaczek et al., 2007).

#### 432 **Ca<sup>2+</sup> imaging**

433 Calcium imaging with YCNano-65 expressing plants was performed as described previously (Choi et al.,  
434 2014, Lenglet et al., 2017, Toyota et al., 2018). In brief, YCNano-65 was visualized by a fluorescence stereo  
435 microscope (Nikon) with a 1 $\times$  objective lens (Nikon), image splitting optics (Hamamatsu Photonics) and a  
436 sCMOS camera (Hamamatsu Photonics). To excite YCNano-65, a mercury lamp (Nikon), a 436/20 nm  
437 excitation filter (Chroma) and a 455 nm dichroic mirror (Chroma) were used. The fluorescent signal from  
438 YCNano-65 was separated by a 515 nm dichroic mirror (Chroma) equipped in the image splitting optics. The  
439 resultant CFP and YFP (FRET) signals passed independently through a 480/40 nm and 535/30 nm emission  
440 filters, respectively (Chroma). A pair of the CFP and FRET images was simultaneously acquired every 4 s  
441 with the sCMOS camera using NIS-Elements imaging software (Nikon). Approximately 2  $\mu$ L of 1  $\mu$ M flg22  
442 was applied to the adaxial surface of cotyledons in 7-day-old seedlings, in which a region of interest (ROI)  
443 was placed to analyze both CFP and FRET signals. The FRET/CFP ratio was calculated by the 6D imaging  
444 plug-in modules (Nikon).

#### 445 **MAPK assay**

446 MAPK assays were performed as previously described (Yadeta et al., 2017). In brief, 4-week-old  
447 Arabidopsis plants were sprayed with 10  $\mu$ M flg22 with 0.025 % Silwet L-77. Leaf samples were ground in  
448 liquid nitrogen and sand. Extraction buffer [50 mM HEPES (pH7.4), 50 mM NaCl, 10 mM EDTA, 0.2 %  
449 Triron X-100, 1 % Protease inhibitor cocktail (SIGMA, #P9599), 1 % Halt phosphatase inhibitor cocktail  
450 (Thermo scientific, #78428)] was added (2 mL/g plant powder). Samples were incubated at 4 °C for 30 min

451 and centrifuged at 12,000 x g, 4 °C for 10 min. The supernatant was used for immunoblotting with anti-  
452 Phospho-p44/42 MAPK (Cell Signaling Technology, #4370) and IRDye800CW anti-rabbit IgG (LI-COR,  
453 #926-32211) antibodies.

#### 454 **Callose Staining**

455 Callose staining was performed as described previously (Hunter et al., 2019).

#### 456 **qRT-PCR**

457 Col-0, *crk2* and *fls2* seedlings were grown on MS 1 % sucrose agar plate for 5 days and were transferred into  
458 MS 1 % sucrose liquid media and grown for 5 days. Plants were incubated with 1 μM flg22 for 30 min, 1 h  
459 and 3 h, respectively. Plants were ground in liquid nitrogen and total RNA was extracted using the GeneJET  
460 Plant RNA purification Kit (Thermo scientific, #K0802). Total RNA was treated with DNase I (Thermo  
461 scientific, #EN0525) and cDNA was synthesized with Maxima H Minus Reverse Transcriptase (Thermo  
462 scientific, #EP0751). qPCR analysis was performed with CFX real-time PCR (BioRad, Hercules, CA, US)  
463 using 5× HOT FIREPol EvaGreen qPCR Mix Plus ROX (Soils Biodyne). *SAND*, *TIP41* and *YLS8* were used  
464 as reference genes for normalization. Relative expression was calculated with qBase+  
465 (Biogazelle; <https://www.qbaseplus.com/>). Primers are listed in Table S3.

#### 466 **Phytohormone analysis**

467 SA was analyzed from liquid-cultured seedlings as described previously (Forcat, Bennett et al., 2008) with  
468 minor modifications. Seedlings were flash-frozen in liquid nitrogen and freeze-dried for 24 h. About 6 mg  
469 aliquots of freeze-dried material were homogenized by shaking with 5 mm stainless steel beads in a Qiagen  
470 Tissue Lyser II for 2 min at 25 Hz. Shaking was repeated after addition of 400 μL extraction buffer (10 %  
471 methanol, 1 % acetic acid) with internal standard (28 ng Salicylic-d<sub>4</sub> Acid; CDN Isotopes, Pointe-Claire,  
472 Canada). Samples were then incubated on ice for 30 min and centrifuged for 10 min at 16,000 x g and 4 °C.  
473 Supernatants were transferred into fresh 2 mL tubes and pellets were re-extracted with 400 μL extraction  
474 buffer without internal standards. Supernatants were combined and centrifuged 3 times to remove all debris  
475 before LC-MS/MS analysis.

476 The chromatographic separation was carried out using an Acquity UHPLC Thermo system  
477 (Waters, Milford, U.S.) equipped with a Waters Cortecs C18 column (2.7 μm, 2.1 x 100 mm). The solvent  
478 gradient (acetonitrile (ACN) / water with 0.1 % formic acid each) was adapted to a total run time of 7 min: 0-  
479 4 min 20 % to 95 % ACN, 4-5 min 95 % ACN, 5-7 min 95 % to 20 % ACN; flow rate 0.4 mL / min. For  
480 hormone identification and quantification, a tandem mass spectrometric system Xevo TQ-  
481 XS, triple quadrupole mass analyser (QqQ) with a ZSpray ESI function (Waters, Milford, U.S.) was used.  
482 Mass transitions were: SA 137 > 93, D<sub>4</sub>-SA 141 > 97.

### 483 **Protein extraction and Co-immunoprecipitation**

484 Co-immunoprecipitation was performed as described previously (Kadota et al., 2016). Homozygous  
485 *35S::FLAG-RBOHD/rbohD* was crossed with homozygous *35S::CRK2-YFP/Col-0* or *35S::YFP-6Myc/Col-0*.  
486 *35S::FLAG-RBOHD/35S::CRK2-YFP/rbohD* F3 plants were selected by kanamycin resistance (homozygous  
487 FLAG-RBOHD insertion) and PCR (homozygous *rbohD* T-DNA insertion). F1 and F3 plants were grown on  
488 MS 1 % sucrose agar plate for 7 days and were transferred into MS 1 % sucrose liquid media and grown for  
489 8-10 days. F3 plants were incubated in water or 1  $\mu$ M flg22 for 10 min or 30 min after vacuum application  
490 for 2 min. Plants were ground in liquid nitrogen and sand. Extraction buffer [50 mM Tris-HCl (pH 7.5), 150  
491 mM NaCl, 10 % Glycerol, 5 mM DTT, 1 % Protease inhibitor cocktail (SIGMA, P9599), 2 % IGEPAL  
492 CA630, 1 mM Na<sub>2</sub>MoO<sub>4</sub>·2H<sub>2</sub>O, 2.5 mM NaF, 1.5 mM Activated sodium orthovanadate, 1 mM PMSF] was  
493 added at 1.5 - 2 mL/g fresh weight. Samples were incubated at 4 °C for 1 h and centrifuged at 15,000 x g,  
494 4 °C for 20 min. Supernatants were adjusted to 5 mg/mL protein concentration and incubated for 1 h at 4 °C  
495 with 100  $\mu$ L of anti-GFP magnetic beads (Miltenyi Biotec, #130-091-125). Bound proteins were analyzed by  
496 immunoblotting with anti-GFP (Invitrogen, #A11122), anti-RBOHD (Agrisera, #AS15-2962), and  
497 IRDye800CW anti-rabbit IgG (LI-COR, #926-32211) antibodies.

498 To detect 3FLAG-RBOHD, total protein was extracted from *RBOHDpro::3FLAG-RBOHD (WT or*  
499 *S703A)/rbohD* T3 homozygous plants with the same extraction buffer and analyzed by immunoblotting with  
500 anti-FLAG (Sigma, #F1804 and IRDye800CW anti-mouse IgG (LI-COR, #926-32210) antibodies.

### 501 **Protein purification from *E.coli***

502 Cytosolic regions of CRK2 were expressed in *Escherichia coli* Lemo21. Cytosolic regions of RBOHD and  
503 Maltose binding protein (MBP) were expressed in *Escherichia coli* BL21. Glutathione S transferase (GST)-  
504 tagged recombinant proteins were purified using glutathione sepharose 4B (GE Healthcare, #17-0756-01)  
505 according to manufacturer's instructions. MBP-tagged proteins were purified using amylose resin (New  
506 England Biolabs, #E8021S) according to manufacturer's instructions.

### 507 ***In vitro* pull down**

508 6His-GST-CRK2<sub>cyto</sub>, 6His-MBP-RBOHD/N, 6His-MBP-RBOHD/C and MBP were incubated with  
509 glutathione Sepharose 4B in the pull down buffer (20 mM HEPES, 50 mM KCl, 5 mM NaCl, 1 % Tween20,  
510 1 mM DTT and 100  $\mu$ M PMSF) at 4 °C for 1 h. The glutathione sepharose 4B was washed four times with  
511 the pull down buffer and eluted with 10 mM reduced glutathione. The mixture was analyzed by  
512 immunoblotting anti-6xHis (Invitrogen, #MA1-135), anti-MBP (Santa Cruz Biotechnology, #sc-13564) and  
513 IRDy800CW anti-mouse IgG antibodies.

### 514 ***In vitro* kinase assay**

515 Purified recombinant proteins were incubated with [ $\gamma$ -<sup>32</sup>P] for 30 min at room temperature in the kinase assay  
516 buffer [50 mM HEPES (pH7.4), 1 mM DTT, 10 mM MgCl<sub>2</sub>, 0.6 mM unlabeled ATP]. The mixture was

517 subsequently separated by SDS-PAGE and autoradiography was detected by FLA-5100 image analyzer  
518 (Fujifilm, Japan). For identification of *in vitro* phosphorylation sites by LC-ESI-MS/MS, 1.5 mM unlabeled  
519 ATP was used in the kinase buffer. The proteins were separated by SDS-PAGE, followed by CBB staining  
520 and were digested by trypsin (Thermo scientific, #90057) or Lys-C (Thermo scientific, #90051).

#### 521 **Identification of *in vitro* phosphorylation sites of RBOHD by LC-ESI-MS/MS**

522 Trypsin or Lys-C digested protein samples were analyzed by a Q Exactive mass spectrometer (Thermo  
523 Fisher Scientific, Bremen, Germany) connected to Easy NanoLC 1000 (Thermo Fisher Scientific). Peptides  
524 were first loaded on a trapping column and subsequently separated inline on a 15 cm C18 column (75  $\mu$ m x  
525 15 cm, ReproSil-Pur 5  $\mu$ m 200 Å C18-AQ, Dr. Maisch HPLC GmbH, Ammerbuch-Entringen, Germany).  
526 The mobile phase consisted of water with 0.1 % formic acid (solvent A) or acetonitrile/water [80:20 (v/v)]  
527 with 0.1 % formic acid (solvent B). A linear 10 min gradient from 8 % to 42 % B was used to elute peptides.

528 MS data was acquired automatically by using Thermo Xcalibur 3.1 software (Thermo Fisher Scientific). An  
529 information dependent acquisition method consisted of an Orbitrap MS survey scan of mass range 300-2000  
530 m/z followed by HCD fragmentation for 10 most intense peptide ions. Raw data was searched for protein  
531 identification by Proteome Discoverer (version 2.2) connected to in-house Mascot (v. 2.6.1) server.  
532 Phosphorylation site locations were validated using phosphoRS algorithm. A SwissProt database with a  
533 taxonomy filter *Arabidopsis thaliana* was used. Two missed cleavages were allowed. Peptide mass tolerance  
534  $\pm$  10 ppm and fragment mass tolerance  $\pm$  0.02 Da were used. Carbamidomethyl (C) was set as a fixed  
535 modification and methionine oxidation, acetylation of protein N-terminus, phosphorylation of Ser and Thr  
536 were included as variable modifications. Only peptides with FDR 0.01 were used.

#### 537 **Targeted (phospho) peptide analysis**

538 **Plant treatment and phosphopeptide enrichment.** Arabidopsis seeds were sterilized by incubating with  
539 1.5 % NaClO 0.02 % Triton X-100 solution for 5 min and vernalized at 4 °C for 2 days. Sterilized seeds  
540 were germinated and grown in liquid culture on 6 well plates (30 seeds/well) in MGRL medium with 0.1 %  
541 (w/v) sucrose (2 mL/well; Fujiwara et al., 1992) at 23 °C under continuous light (100  $\mu$ mol m<sup>-2</sup> s<sup>-1</sup>) in a  
542 Percival growth chamber. Plates with 11-day-old seedlings were transferred from the growth chamber to a  
543 workbench and kept o/n for acclimatization before treatments. Seedlings were treated with either 1  $\mu$ M flg22  
544 or sterile water for 5 min after which seedlings were immediately collected and flash-frozen in liquid  
545 nitrogen and stored at -80 °C. Frozen seedlings were disrupted using a Retsch mill (5 min, 30 Hz), and 500  
546  $\mu$ L urea extraction buffer [8M urea in 100mM Tris, pH 8.5, 20  $\mu$ L/mL Phosphatase Inhibitor Cocktail 3  
547 (Sigma, P0044), 20  $\mu$ L/mL Phosphatase Inhibitor Cocktail 2 (Sigma, P5726), 5 mM DTT] was added to the  
548 disrupted frozen powders, mixed briefly and incubated at RT for 30 min. After centrifugation at 15,000 x g  
549 for 10 min, supernatants were transferred to fresh tubes. Protein concentrations were determined using Pierce  
550 660 nm protein assay (Thermo Scientific). Extracts with 500  $\mu$ g of protein were alkylated with 14 mM  
551 chloroacetamide (CAA) at RT for 30 min in the dark, CAA was quenched by addition of 1/200 sample

552 volume 1M DTT. Samples were diluted 1:8 with 0.1 M Tris, pH 8.5, 1 mM CaCl<sub>2</sub> and were digested o/n at  
553 RT either with 5 µg trypsin or 5 µg Lys-C. Digestion reaction was terminated by addition of TFA (0.1 %  
554 final concentration), and peptides were desalted using C18 SepPaks [1cc cartridge, 100 mg (WAT023590)].  
555 In brief, SepPaks were conditioned using methanol (1 mL), buffer B (80 % acetonitrile, 0.1 % TFA; 1 mL)  
556 and buffer A (0.1 % TFA; 2 mL). Samples were loaded by gravity flow, washed with buffer A (1 x 1 mL, 1 x  
557 2 mL) and eluted with buffer B (2 x 400 µL). 40 µL of eluates were kept separately to measure non-  
558 phosphopeptides and the rest were used for further phosphopeptide enrichment. Phosphopeptide enrichment  
559 was performed by hydroxy acid-modified metal-oxide chromatography (HAMMOC) using titania as  
560 described previously with minor modifications (Nakagami, 2014; Sugiyama et al., 2007).

561 **LC-MS/MS data acquisition.** Samples were analyzed using an EASY-nLC 1200 (Thermo Fisher) coupled  
562 to a Q Exactive Plus mass spectrometer (Thermo Fisher). Peptides were separated on 16 cm frit-less silica  
563 emitters (New Objective, 0.75 µm inner diameter), packed in-house with reversed-phase ReproSil-Pur C18  
564 AQ 1.9 µm resin (Dr. Maisch). Peptides were loaded on the column and eluted for 115 min using a  
565 segmented linear gradient of 5 % to 95 % solvent B (0 min, 5 % B; 0-5 min, 5 % B; 5-65 min, 20 % B; 65-90  
566 min, 35 % B; 90-100 min, 55 % B; 100-105 min, 95 % B; 105-115 min, 95 % B) [solvent A (0 % ACN,  
567 0.1 % FA); solvent B (80 % ACN, 0.1 % FA)] at a flow rate of 300 nL/min. Mass spectra were acquired  
568 using a targeted (parallel reaction monitoring, PRM) approach. The acquisition method consisted of a full  
569 scan method combined with a non-scheduled PRM method. The 16 targeted precursor ions were selected  
570 based on the results of a DDA peptide search of phospho-enriched samples in Skyline (MacLean, Tomazela  
571 et al., 2010) (Version 4.2.0.x, <https://skyline.ms>). MS spectra were acquired in the Orbitrap analyzer with a  
572 mass range of 300–1750 m/z at a resolution of 70,000 FWHM and a target value of  $3 \times 10^6$  ions, followed by  
573 MS/MS acquisition for the 16 targeted precursors. Precursors were selected with an isolation window of 2.0  
574 m/z. HCD fragmentation was performed at a normalized collision energy of 27. MS/MS spectra were  
575 acquired with a target value of  $2 \times 10^5$  ions at a resolution of 17,500 FWHM, a maximum injection time of  
576 120 ms and a fixed first mass of m/z 100.

577 **MS data analysis.** Raw data from PRM acquisition were processed using MaxQuant software (version  
578 1.5.7.4, <http://www.maxquant.org/>; Cox & Mann, 2008). MS/MS spectra were searched by the Andromeda  
579 search engine against a combined database containing the sequences from *Arabidopsis thaliana*  
580 (TAIR10\_pep\_20101214; [ftp://ftp.arabidopsis.org/home/tair/Proteins/TAIR10\\_protein\\_lists/](ftp://ftp.arabidopsis.org/home/tair/Proteins/TAIR10_protein_lists/)) and sequences  
581 of 248 common contaminant proteins and decoy sequences. Trypsin specificity was required and a maximum  
582 of two missed cleavages allowed. Minimal peptide length was set to seven amino acids.  
583 Carbamidomethylation of cysteine residues was set as fixed, phosphorylation of serine, threonine and  
584 tyrosine, oxidation of methionine and protein N-terminal acetylation as variable modifications. The match  
585 between runs option was disabled. Peptide-spectrum-matches and proteins were retained if they were below  
586 a false discovery rate of 1 % in both cases. The “msms.txt” output from MaxQuant was further analyzed

587 using Skyline in PRM mode. Trypsin specificity was required and a maximum of two missed cleavages  
588 allowed. Minimal and maximum peptide lengths were set to 7 and 25 amino acids, respectively.  
589 Carbamidomethylation of cysteine, phosphorylation of serine, threonine and tyrosine, oxidation of  
590 methionine, and protein N-terminal acetylation were set as modifications. Results were filtered for precursor  
591 charges of 2 and 3, and b- and y-ions with ion charges of +1 and +2. Product ions were set to “from ion 1 to  
592 last ion”. All chromatograms were inspected manually and peak integration was corrected for best  
593 representation of MS2 signals. Peak area data was exported and further processed. The Skyline documents  
594 containing the data for the targeted phosphoproteomics experiments have been uploaded to Panorama Public  
595 and can be obtained from <https://panoramaweb.org/RBOHDphosphorylation.url>. Raw data have  
596 been deposited to the ProteomeXchange Consortium via the Panorama partner repository with the dataset  
597 identifier PXD013525 (<http://proteomecentral.proteomexchange.org/cgi/GetDataset?ID=PXD013525>).

### 598 **Phylogenetic analysis**

599 Sequences for plant *RBOH* genes were extracted from public genome databases and manually curated. The  
600 phylogenetic maximum likelihood tree was inferred from a PAGAN (Löytynoja et al., 2012) alignment using  
601 FASTTREE (Price et al., 2010), 1000 bootstrap replicates were calculated using RAxML (Stamatakis, 2014).  
602 The sequence alignment of plant RBOHs, human NOX2 and NOX5 $\beta$  can be viewed on the Wasabi  
603 (Veidenberg et al., 2016) webserver (<http://was.bi?id=JauZ6q>). Sequence motifs were analyzed using the  
604 MEME suite (Bailey et al., 2009).

### 605 **Statistical analysis**

606 Statistical analyses were performed with JMP Pro13 (SAS, <https://www.jmp.com/>).

### 607 **Data availability**

608 Phylogenetic tree of human and plant NADPH oxidases with bootstrap information for 1000 replicates and  
609 corresponding sequence alignment has been deposited on Wasabi (<http://wasabiapp.org>). Data for the  
610 targeted phosphoproteomics experiments has been uploaded to Panorama Public  
611 (<https://panoramaweb.org/RBOHDphosphorylation.url>). Raw data have been deposited to the  
612 ProteomeXchange Consortium via the Panorama partner repository with the dataset identifier PXD013525  
613 (<http://proteomecentral.proteomexchange.org/cgi/GetDataset?ID=PXD013525>). Materials used in the  
614 experimental work are available from the authors upon request.



615 **Author contributions**

616 SK, KH, HN and MW conceived and designed the project. SK, KH, LV, CT, AV, AR, LM, MWi, MT, and  
617 MWr carried out experiments. SK, KH, LV, AV, AR, TH, MT, and MWr analyzed the data. AH, SCS and  
618 HN designed and performed targeted MS analysis and analyzed the data. SK and MWr wrote the manuscript.  
619 All authors read and contributed to the final manuscript.

620 **Acknowledgments**

621 The authors would like to thank Dr. Julia Krasensky-Wrzaczek and Dr. Alexey Shapiguzov (University of  
622 Helsinki, Finland) for critical comments on the manuscript. We thank Tuomas Puukko, Nghia Le Tri, Simon  
623 Schmitz, Denis Owczarek, Jan-Niklas Weber (University of Helsinki, Finland) and Jiaqi Wang (Saitama  
624 University, Japan) for technical assistance, Dr. Riccardo Siligato for the Gateway Multisite vector system.  
625 LV and TH thank Trude Johansen for technical assistance in LC-MS/MS based hormone analysis. We thank  
626 Dr. Yasuhiro Kadota (RIKEN Yokohama, Japan) and Prof. Cyril Zipfel (University of Zurich, Switzerland)  
627 for *35S::FLAG-RBOHD/rbohD* seeds and pOPINM-RBOHD/N and pBin19g-pRBOHD::3FLAG-RBOHD  
628 plasmids. We thank Prof. Simon Gilroy (University of Wisconsin, USA) for *YCNano65* seeds. The  
629 pcDNA3.1-3FLAG-RBOHD and pcDNA3.1-3FLAG-MCS plasmids were provided by Prof. Kazuyuki  
630 Kuchitsu (Tokyo University of Science, Japan). Microscopy imaging was performed at the Light Microscopy  
631 Unit, Institute of Biotechnology, University of Helsinki. Mass spectrometry analyses were performed at the  
632 Turku Proteomics Facility, supported by Biocenter Finland. This work was supported by the Academy of  
633 Finland (grant numbers #275632, #283139, and #312498 to MW), the University of Helsinki (Three-year  
634 fund allocation to MW), the Finnish Cultural Foundation (grant numbers 00170046 and 00181379 to LV),  
635 and KAKENHI (17H05007, 18H04775, and 18H05491 to MT), the Max-Planck-Gesellschaft (to HN). KH,  
636 SK, AV and MW are members of the Centre of Excellence in the Molecular Biology of Primary Producers  
637 (2014-2019) funded by the Academy of Finland (grant numbers #271832 and #307335).

638

639 **References**

- 640 Acharya BR, Raina S, Maqbool SB, Jagadeeswaran G, Mosher SL, Appel HM, Schultz JC, Klessig DF,  
641 Raina R (2007) Overexpression of CRK13, an Arabidopsis cysteine-rich receptor-like kinase, results in  
642 enhanced resistance to *Pseudomonas syringae*. *Plant J* 50: 488-499
- 643 Bailey TL, Boden M, Buske FA, Frith M, Grant CE, Clementi L, Ren J, Li WW, Noble WS (2009) MEME  
644 SUITE: tools for motif discovery and searching. *Nucleic Acids Res* 37: W202-8
- 645 Banfi B, Tirone F, Durussel I, Knisz J, Moskwa P, Molnar GZ, Krause KH, Cox JA (2004) Mechanism of  
646 Ca<sup>2+</sup> activation of the NADPH oxidase 5 (NOX5). *J Biol Chem* 279: 18583-18591
- 647 Beaumel S, Picciocchi A, Debeurme F, Vives C, Hesse AM, Ferro M, Grunwald D, Stieglitz H, Thepchatri P,  
648 Smith SME, Fieschi F, Stasia MJ (2017) Down-regulation of NOX2 activity in phagocytes mediated by  
649 ATM-kinase dependent phosphorylation. *Free Radic Biol Med* 113: 1-15
- 650 Benschop JJ, Mohammed S, O'Flaherty M, Heck AJ, Slijper M, Menke FL (2007) Quantitative  
651 phosphoproteomics of early elicitor signaling in *Arabidopsis*. *Mol Cell Proteomics* 6: 1198-1214
- 652 Bigeard J, Colcombet J, Hirt H (2015) Signaling mechanisms in pattern-triggered immunity (PTI). *Mol Plant*  
653 8: 521-539
- 654 Boudsocq M, Danquah A, de Zelicourt A, Hirt H, Colcombet J (2015) Plant MAPK cascades: Just rapid  
655 signaling modules? *Plant Signal Behav* 10: e1062197
- 656 Bourdais G, Burdiak P, Gauthier A, Nitsch L, Salojärvi J, Rayapuram C, Idänheimo N, Hunter K, Kimura S,  
657 Merilo E, Vaattovaara A, Oracz K, Kaufholdt D, Pallon A, Anggoro DT, Glów D, Lowe J, Zhou J,  
658 Mohammadi O, Puukko T et al. (2015) Large-scale phenomics identifies primary and fine-tuning roles for  
659 CRKs in responses related to oxidative stress. *PLOS Genetics* 11: e1005373
- 660 Caillaud MC, Wirthmueller L, Sklenar J, Findlay K, Piquerez SJ, Jones AM, Robatzek S, Jones JD, Faulkner  
661 C (2014) The plasmodesmal protein PDL1 localises to haustoria-associated membranes during downy  
662 mildew infection and regulates callose deposition. *PLoS Pathog* 10: e1004496
- 663 Chen D, Cao Y, Li H, Kim D, Ahsan N, Thelen J, Stacey G (2017) Extracellular ATP elicits DORN1-  
664 mediated RBOHD phosphorylation to regulate stomatal aperture. *Nat Commun* 8: 2265
- 665 Chen F, Yu Y, Haigh S, Johnson J, Lucas R, Stepp DW, Fulton DJ (2014) Regulation of NADPH oxidase 5  
666 by protein kinase C isoforms. *PLoS One* 9: e88405
- 667 Chen K, Fan B, Du L, Chen Z (2004) Activation of hypersensitive cell death by pathogen-induced receptor-  
668 like protein kinases from *Arabidopsis*. *Plant Mol Biol* 56: 271-283
- 669 Chern M, Xu Q, Bart RS, Bai W, Ruan D, Sze-To WH, Canlas PE, Jain R, Chen X, Ronald PC (2016) A  
670 genetic screen identifies a requirement for cysteine-rich-receptor-like kinases in rice NH1 (OsNPR1)-  
671 mediated immunity. *PLoS Genet* 12: e1006049
- 672 Choi WG, Toyota M, Kim SH, Hilleary R, Gilroy S (2014) Salt stress-induced Ca<sup>2+</sup> waves are associated  
673 with rapid, long-distance root-to-shoot signaling in plants. *Proc Natl Acad Sci USA* 111: 6497-6502
- 674 Clough SJ, Bent AF (1998) Floral dip: a simplified method for *Agrobacterium*-mediated transformation of  
675 *Arabidopsis thaliana*. *Plant J* 16: 735-743
- 676 Couto D, Zipfel C (2016) Regulation of pattern recognition receptor signalling in plants. *Nat Rev Immunol*  
677 16: 537-552
- 678 Cox J, Mann M (2008) MaxQuant enables high peptide identification rates, individualized p.p.b.-range mass  
679 accuracies and proteome-wide protein quantification. *Nat Biotechnol* 26: 1367-1372
- 680 Denness L, McKenna JF, Segonzac C, Wormit A, Madhou P, Bennett M, Mansfield J, Zipfel C, Hamann T  
681 (2011) Cell wall damage-induced lignin biosynthesis is regulated by a reactive oxygen species- and jasmonic  
682 acid-dependent process in *Arabidopsis*. *Plant Physiol* 156: 1364-1374
- 683 Dubiella U, Seybold H, Durian G, Komander E, Lassig R, Witte CP, Schulze WX, Romeis T (2013)  
684 Calcium-dependent protein kinase/NADPH oxidase activation circuit is required for rapid defense signal  
685 propagation. *Proc Natl Acad Sci USA* 110: 8744-8749

- 686 Ellinger D, Voigt CA (2014) Callose biosynthesis in Arabidopsis with a focus on pathogen response: what  
687 we have learned within the last decade. *Ann Bot* 114: 1349-1358
- 688 Forcat S, Bennett MH, Mansfield JW, Grant MR (2008) A rapid and robust method for simultaneously  
689 measuring changes in the phytohormones ABA, JA and SA in plants following biotic and abiotic stress.  
690 *Plant Methods* 4: 16
- 691 Fujiwara T, Hirai MY, Chino M, Komeda Y, Naito S (1992) Effects of sulfur nutrition on expression of the  
692 soybean seed storage protein genes in transgenic petunia. *Plant Physiol* 99: 263-268
- 693 Han JP, Koster P, Drerup MM, Scholz M, Li S, Edel KH, Hashimoto K, Kuchitsu K, Hippler M, Kudla J  
694 (2019) Fine-tuning of RBOHF activity is achieved by differential phosphorylation and Ca<sup>2+</sup> binding. *New*  
695 *Phytol* 221: 1935-1949
- 696 Hunter K, Kimura S, Rokka A, Tran HC, Toyota M, Kukkonen JP, Wrzaczek M (2019) CRK2 enhances salt  
697 tolerance by regulating callose deposition in connection with PLDalpha1. *Plant Physiol*
- 698 Idänheimo N, Gauthier A, Salojärvi J, Siligato R, Brosché M, Kollist H, Mähönen AP, Kangasjärvi J,  
699 Wrzaczek M (2014) The *Arabidopsis thaliana* cysteine-rich receptor-like kinases CRK6 and CRK7 protect  
700 against apoplastic oxidative stress. *Biochem Biophys Res Commun* 445: 457-462
- 701 Jagnandan D, Church JE, Banfi B, Stuehr DJ, Marrero MB, Fulton DJ (2007) Novel mechanism of activation  
702 of NADPH oxidase 5. Calcium sensitization via phosphorylation. *J Biol Chem* 282: 6494-6507
- 703 Jiménez-Quesada MJ, Traverso JA, Alché Jde D (2016) NADPH oxidase-dependent superoxide production  
704 in plant reproductive tissues. *Front Plant Sci* 7: 359
- 705 Kadota Y, Macho AP, Zipfel C (2016) Immunoprecipitation of plasma membrane receptor-like kinases for  
706 identification of phosphorylation sites and associated proteins. *Methods Mol Biol* 1363: 133-144
- 707 Kadota Y, Shirasu K, Zipfel C (2015) Regulation of the NADPH Oxidase RBOHD During Plant Immunity.  
708 *Plant Cell Physiol* 56: 1472-80
- 709 Kadota Y, Sklenar J, Derbyshire P, Stransfeld L, Asai S, Ntoukakis V, Jones JD, Shirasu K, Menke F, Jones  
710 A, Zipfel C (2014) Direct regulation of the NADPH oxidase RBOHD by the PRR-associated kinase BIK1  
711 during plant immunity. *Mol Cell* 54: 43-55
- 712 Kawarazaki T, Kimura S, Iizuka A, Hanamata S, Nibori H, Michikawa M, Imai A, Abe M, Kaya H,  
713 Kuchitsu K (2013) A low temperature-inducible protein AtSRC2 enhances the ROS-producing activity of  
714 NADPH oxidase AtRbohF. *Biochim Biophys Acta* 1833: 2775-2780
- 715 Kaya H, Takeda S, Kobayashi MJ, Kimura S, Iizuka A, Imai A, Hishinuma H, Kawarazaki T, Mori K,  
716 Yamamoto Y, Murakami Y, Nakauchi A, Abe M, Kuchitsu K (2018) Comparative analysis of the reactive  
717 oxygen species-producing enzymatic activity of Arabidopsis NADPH oxidases. *Plant J*
- 718 Kimura S, Kaya H, Kawarazaki T, Hiraoka G, Senzaki E, Michikawa M, Kuchitsu K (2012) Protein  
719 phosphorylation is a prerequisite for the Ca<sup>2+</sup>-dependent activation of *Arabidopsis* NADPH oxidases and  
720 may function as a trigger for the positive feedback regulation of Ca<sup>2+</sup> and reactive oxygen species. *Biochim*  
721 *Biophys Acta* 1823: 398-405
- 722 Kimura S, Waszczak C, Hunter K, Wrzaczek M (2017) Bound by fate: The role of reactive oxygen species in  
723 receptor-like kinase signaling. *Plant Cell* 29: 638-654
- 724 Lee DSK, Young Cheon; Kwon, Sun Jae; Ryu, Choong-Min; Park, Ohkmae K. (2017) The Arabidopsis  
725 cysteine-rich receptor-like kinase CRK36 regulates immunity through interaction with the cytoplasmic kinase  
726 BIK1. *Frontiers in Plant Science* 8: 1856
- 727 Lee Y, Rubio MC, Alassimone J, Geldner N (2013) A mechanism for localized lignin deposition in the  
728 endodermis. *Cell* 153: 402-412
- 729 Lee Y, Yoon TH, Lee J, Jeon SY, Lee JH, Lee MK, Chen H, Yun J, Oh SY, Wen X, Cho HK, Mang H,  
730 Kwak JM (2018) A lignin molecular brace controls precision processing of cell walls critical for surface  
731 integrity in *Arabidopsis*. *Cell* 173: 1468-1480

- 732 Lenglet A, Jaslan D, Toyota M, Mueller M, Muller T, Schonknecht G, Marten I, Gilroy S, Hedrich R,  
733 Farmer EE (2017) Control of basal jasmonate signalling and defence through modulation of intracellular  
734 cation flux capacity. *New Phytol* 216: 1161-1169
- 735 Li L, Li M, Yu L, Zhou Z, Liang X, Liu Z, Cai G, Gao L, Zhang X, Wang Y, Chen S, Zhou JM (2014) The  
736 FLS2-associated kinase BIK1 directly phosphorylates the NADPH oxidase RbohD to control plant immunity.  
737 *Cell Host Microbe* 15: 329-338
- 738 Lin ZJ, Liebrand TW, Yadeta KA, Coaker G (2015) PBL13 Is a serine/threonine protein kinase that  
739 negatively regulates Arabidopsis immune responses. *Plant Physiol* 169: 2950-2962
- 740 Loytynoja A, Vilella AJ, Goldman N (2012) Accurate extension of multiple sequence alignments using a  
741 phylogeny-aware graph algorithm. *Bioinformatics* 28: 1684-91
- 742 MacLean B, Tomazela DM, Shulman N, Chambers M, Finney GL, Frewen B, Kern R, Tabb DL, Liebler DC,  
743 MacCoss MJ (2010) Skyline: an open source document editor for creating and analyzing targeted proteomics  
744 experiments. *Bioinformatics* 26: 966-968
- 745 Meitzler JL, Antony S, Wu Y, Juhasz A, Liu H, Jiang G, Lu J, Roy K, Doroshov JH (2014) NADPH  
746 oxidases: a perspective on reactive oxygen species production in tumor biology. *Antioxid Redox Signal* 20:  
747 2873-2889
- 748 Nakagami H (2014) StageTip-based HAMMOC, an efficient and inexpensive phosphopeptide enrichment  
749 method for plant shotgun phosphoproteomics. *Methods Mol Biol* 1072: 595-607
- 750 Ogasawara Y, Kaya H, Hiraoka G, Yumoto F, Kimura S, Kadota Y, Hishinuma H, Senzaki E, Yamagoe S,  
751 Nagata K, Nara M, Suzuki K, Tanokura M, Kuchitsu K (2008) Synergistic activation of the Arabidopsis  
752 NADPH oxidase AtrbohD by Ca<sup>2+</sup> and phosphorylation. *J Biol Chem* 283: 8885-8892
- 753 Pandey D, Gratton JP, Rafikov R, Black SM, Fulton DJ (2011) Calcium/calmodulin-dependent kinase II  
754 mediates the phosphorylation and activation of NADPH oxidase 5. *Mol Pharmacol* 80: 407-415
- 755 Price MN, Dehal PS, Arkin AP (2010) FastTree 2--approximately maximum-likelihood trees for large  
756 alignments. *PLoS One* 5: e9490
- 757 Raad H, Pacllet MH, Boussetta T, Kroviarski Y, Morel F, Quinn MT, Gougerot-Pocidallo MA, Dang PM, El-  
758 Benna J (2009) Regulation of the phagocyte NADPH oxidase activity: phosphorylation of gp91<sup>phox</sup>/NOX2 by  
759 protein kinase C enhances its diaphorase activity and binding to Rac2, p67<sup>phox</sup>, and p47<sup>phox</sup>. *FASEB J* 23:  
760 1011-1022
- 761 Schmidt R, Kunkowska AB, Schippers JH (2016) Role of reactive oxygen species during cell expansion in  
762 leaves. *Plant Physiol* 172: 2098-2106
- 763 Shiu SH, Bleecker AB (2001) Plant receptor-like kinase gene family: diversity, function, and signaling. *Sci*  
764 *STKE* 2001: re22
- 765 Siligato R, Wang X, Yadav SR, Lehesranta S, Ma G, Ursache R, Sevilem I, Zhang J, Gorte M, Prasad K,  
766 Wrzaczek M, Heidstra R, Murphy A, Scheres B, Mahonen AP (2016) MultiSite gateway-compatible cell  
767 type-specific gene-inducible system for plants. *Plant Physiol* 170: 627-641
- 768 Stamatakis A (2014) RAxML version 8: a tool for phylogenetic analysis and post-analysis of large  
769 phylogenies. *Bioinformatics* 30: 1312-1313
- 770 Stone JM, Walker JC (1995) Plant protein kinase families and signal transduction. *Plant Physiol* 108: 451-  
771 457
- 772 Sugiyama N, Masuda T, Shinoda K, Nakamura A, Tomita M, Ishihama Y (2007) Phosphopeptide  
773 enrichment by aliphatic hydroxy acid-modified metal oxide chromatography for nano-LC-MS/MS in  
774 proteomics applications. *Mol Cell Proteomics* 6: 1103-1109
- 775 Suzuki N, Miller G, Morales J, Shulaev V, Torres MA, Mittler R (2011) Respiratory burst oxidases: the  
776 engines of ROS signaling. *Curr Opin Plant Biol* 14: 691-699
- 777 Tanaka H, Osakabe Y, Katsura S, Mizuno S, Maruyama K, Kusakabe K, Mizoi J, Shinozaki K, Yamaguchi-  
778 Shinozaki K (2012) Abiotic stress-inducible receptor-like kinases negatively control ABA signaling in  
779 Arabidopsis. *Plant J* 70: 599-613

- 780 Torres MA, Dangl JL, Jones JD (2002) Arabidopsis gp91<sup>phox</sup> homologues *AtrbohD* and *AtrbohF* are required  
781 for accumulation of reactive oxygen intermediates in the plant defense response. *Proc Natl Acad Sci USA* 99:  
782 517-522
- 783 Toyota M, Spencer D, Sawai-Toyota S, Wang J, Zhang T, Koo AJ, Howe GA, Gilroy S (2018) Glutamate  
784 triggers long-distance, calcium-based plant defense signaling. *Science* 361: 1112-1115
- 785 Vaattovaara A, Brandt B, Rajaraman S, Safronov O, Veidenberg A, Luklova M, Kangasjarvi J, Loytynoja A,  
786 Hothorn M, Salojarvi J, Wrzaczek M (2019) Mechanistic insights into the evolution of DUF26-containing  
787 proteins in land plants. *Commun Biol* 2: 56
- 788 Waszczak C, Carmody M, Kangasjärvi J (2018) Reactive oxygen species in plant signaling. *Annu Rev Plant*  
789 *Biol* 69: 209-236
- 790 Veidenberg A, Medlar A, Löytynoja A (2016) Wasabi: An integrated platform for evolutionary sequence  
791 analysis and data visualization. *Mol Biol Evol* 33: 1126-1130
- 792 Veronese P, Nakagami H, Bluhm B, Abuqamar S, Chen X, Salmeron J, Dietrich RA, Hirt H, Mengiste T  
793 (2006) The membrane-anchored *BOTRYTIS-INDUCED KINASE1* plays distinct roles in *Arabidopsis*  
794 resistance to necrotrophic and biotrophic pathogens. *Plant Cell* 18: 257-273
- 795 Whalen MC, Innes RW, Bent AF, Staskawicz BJ (1991) Identification of *Pseudomonas syringae* pathogens  
796 of *Arabidopsis* and a bacterial locus determining avirulence on both *Arabidopsis* and soybean. *Plant Cell* 3:  
797 49-59
- 798 Wrzaczek M, Brosché M, Salojärvi J, Kangasjärvi S, Idänheimo N, Mersmann S, Robatzek S, Karpinski S,  
799 Karpinska B, Kangasjärvi J (2010) Transcriptional regulation of the CRK/DUF26 group of receptor-like  
800 protein kinases by ozone and plant hormones in Arabidopsis. *BMC Plant Biol* 10: 95
- 801 Wrzaczek M, Rozhon W, Jonak C (2007) A Proteasome-regulated glycogen synthase kinase-3 modulates  
802 disease response in plants. *J Biol Chem* 282: 5249-5255
- 803 Yadeta KA, Elmore JM, Creer AY, Feng B, Franco JY, Rufian JS, He P, Phinney B, Coaker G (2017) A  
804 cysteine-rich protein kinase associates with a membrane immune complex and the cysteine residues are  
805 required for cell death. *Plant Physiol* 173: 771-787
- 806 Yeh YH, Chang YH, Huang PY, Huang JB, Zimmerli L (2015) Enhanced Arabidopsis pattern-triggered  
807 immunity by overexpression of cysteine-rich receptor-like kinases. *Front Plant Sci* 6: 322
- 808 Yeh YH, Panzeri D, Kadota Y, Huang YC, Huang PY, Tao CN, Roux M, Chien HC, Chin TC, Chu PW,  
809 Zipfel C, Zimmerli L (2016) The Arabidopsis Malectin-Like/LRR-RLK IOS1 Is Critical for BAK1-  
810 Dependent and BAK1-Independent Pattern-Triggered Immunity. *Plant Cell* 28: 1701-21
- 811 Yun BW, Feechan A, Yin M, Saidi NB, Le Bihan T, Yu M, Moore JW, Kang JG, Kwon E, Spoel SH, Pallas  
812 JA, Loake GJ (2011) S-nitrosylation of NADPH oxidase regulates cell death in plant immunity. *Nature* 478:  
813 264-268
- 814 Zhang J, Shao F, Li Y, Cui H, Chen L, Li H, Zou Y, Long C, Lan L, Chai J, Chen S, Tang X, Zhou JM  
815 (2007) A *Pseudomonas syringae* effector inactivates MAPKs to suppress PAMP-induced immunity in plants.  
816 *Cell Host Microbe* 1: 175-85
- 817 Zhang M, Chiang YH, Toruno TY, Lee D, Ma M, Liang X, Lal NK, Lemos M, Lu YJ, Ma S, Liu J, Day B,  
818 Dinesh-Kumar SP, Dehesh K, Dou D, Zhou JM, Coaker G (2018) The MAP4 kinase SIK1 ensures robust  
819 extracellular ROS burst and antibacterial immunity in plants. *Cell Host Microbe* 24: 379-391
- 820 Zipfel C, Robatzek S, Navarro L, Oakeley EJ, Jones JD, Felix G, Boller T (2004) Bacterial disease resistance  
821 in *Arabidopsis* through flagellin perception. *Nature* 428: 764-767



822 **Figure legends:**

823 **Fig. 1 CRK2 kinase activity is required for plant growth.**

824 **a** Schematic representation of CRK2 structure. SP: signal peptide (AAs 1-29), DUF26-A (AAs 39-132),  
825 DUF26-B (AAs 146-243), TM: transmembrane domain (AAs 261-283), and kinase domain (AAs 325-601).

826 **b** Representative pictures of 21-day-old plants of Col-0, *crk2*, *CRK2pro::CRK2-YFP/crk2*,  
827 *CRK2pro::CRK2<sup>K353E</sup>-YFP/crk2* and *CRK2pro::CRK2<sup>D450N</sup>-YFP/crk2* plants. Bar = 1 cm.

828 **c** Box plot shows the fresh weight of 21-day-old plants (n = 10). Differences between Col-0 and transgenic  
829 lines were evaluated with One-way Anova with Tukey-Kramer HSD, \*\*\* p<0.001, ns, not statistically  
830 significant (Oneway Anova, F value = 71.5559, DF = 7). The experiment was repeated three times with  
831 similar results.

832

833 **Fig. 2 CRK2 regulates flg22-triggered ROS production and resistance to a virulent bacterial pathogen.**

834 **a** and **b** flg22-induced ROS production in Col-0, *crk2* and *CRK2pro::CRK2-YFP/crk2* or  
835 *CRK2pro::CRK2<sup>D450N</sup>-YFP/crk2*. Leaf discs from 28-day-old plants were treated with 200 nM flg22 and  
836 ROS production was measured. Box plot shows cumulative ROS production over 40 min (upper right).

837 **a** Values represent mean  $\pm$ SEM of n  $\geq$  16. Differences compared with Col-0 were evaluated with One-way  
838 Anova (F value = 9.2282, DF = 3) with Tukey-Kramer HSD, \*\*\* p < 0.001, ns, not statistically significant.

839 **b** Values represent the mean  $\pm$ SEM of n  $\geq$  19. Differences compared with Col-0 were evaluated with One-  
840 way Anova (F value = 8.8777, DF = 3) with Tukey-Kramer HSD, \*p < 0.05, \*\*\* p < 0.001.

841 **c** Quantitative analysis of bacterial growth in Col-0, *crk2* and *CRK2pro::CRK2-YFP/crk2* or  
842 *CRK2pro::CRK2<sup>D450N</sup>-YFP/crk2* following syringe infiltration with *Pto* DC3000 (1 x 10<sup>5</sup> CFU/mL). Values  
843 represent mean  $\pm$ SD of n = 3 (0 DPI) or n = 6 (2 DPI). Letters indicate significant differences at p < 0.05  
844 [One-way Anova (F value = 566.5661, DF = 11) with Tukey-Kramer HSD]. **a** - **c** The experiment was  
845 repeated three times with similar results.

846

847 **Fig. 3 CRK2 interacts with RBOHD.**

848 **a** ROS production of RBOHD-expressing HEK293T cells. 3FLAG-RBOHD was transiently co-expressed  
849 with either 3Myc-GFP or CRK2 (WT or D450N)-3Myc. After 30 min 1  $\mu$ M ionomycin was added to the  
850 medium. Values represent mean  $\pm$ SEM of n = 3. E.V. = empty vector. The experiment was repeated three  
851 times with similar results.

852 **b** and **c** Co-IP analysis of interaction between RBOHD and CRK2. CRK2-YFP was immuno-precipitated  
853 using anti-GFP beads followed by immunoblotting with anti-RBOHD and anti-GFP antibodies. FLAG-  
854 RBOHD: 105 kDa, CRK2-YFP: 99.9 kDa and YFP-6Myc: 36.7 kDa.



855 **b** *35S::FLAG-RBOHD/rbohD x 35S::CRK2-YFP/Col-0* (F1) and *35S::FLAG-RBOHD/rbohD x 35S::YFP-*  
856 *6Myc/Col-0* (F1) plants. The experiment was repeated three times with similar results.

857 **c** *35S::FLAG-RBOHD/35S::CRK2-YFP/rbohD* plants with 1  $\mu$ M flg22 treatment. M: Protein molecular  
858 marker, \*: unspecific signal. Total protein from *rbohD* was used for immunoblot of input as a negative  
859 control.

860 **d** Schematic representation of RBOHD structure. EF-hands (AAs 257-329), TM: transmembrane domains  
861 (AAs 374 - 605), FAD: FAD-binding domain (AAs 613-730), NADPH: NADPH-binding domain (AAs 736-  
862 904), RBOHD/N: RBOHD N-terminal region (AAs 1-376), RBOHD/C: RBOHD C-terminal region (AAs  
863 606-922); C1: RBOHD/C1 (AAs 606-741), C2: RBOHD/C2 (AAs 696-831), C3: RBOHD/C3 (AAs 787-  
864 922).

865 **e** *In vitro* pull-down analysis of direct interaction between RBOHD and CRK2. MBP, 6His-MBP-RBOHD/N  
866 and 6His-MBP-RBOHD/C were incubated with 6His-GST-CRK2cyto and pull down with GST followed by  
867 immunoblotting with anti-6His and anti-MBP antibodies. 6His-GST-CRK2cyto: 68.5 kDa, 6His-MBP-  
868 RBOHD/N: 84.7 kDa, 6His-MBP-RBOHD/C: 78.4 kDa, MBP: 50.8 kDa. The experiment was repeated two  
869 times with similar results.

870

871 **Fig. 4 CRK2 phosphorylates the cytosolic regions of RBOHD *in vitro*.**

872 **a** and **b** Autophosphorylation and transphosphorylation were visualized with [ $\gamma$ -<sup>32</sup>P] ATP and  
873 autoradiography (upper panel). Input proteins were stained with coomassie brilliant blue (CBB) (lower  
874 panel). Experiments were repeated three times with similar results. 6His-GST-CRK2cyto: 68.5 kDa, 6His-  
875 MBP-RBOHD/N: 84.7 kDa, 6His-MBP-RBOHD/C1:57.9 kDa, /C2:57.8 kDa, /C3:58.4 kDa, 6His-MBP:  
876 44.3 kDa.

877 **a** *In vitro* transphosphorylation of 6His-MBP-RBOHD N-terminus by 6His-GST-CRK2cyto. 6His-MBP-  
878 RBOHD/N or 6His-MBP was incubated with 6His-GST-CRK2cyto in kinase buffer.

879 **b** *In vitro* transphosphorylation of 6His-MBP-RBOHD C-terminus by 6His-GST-CRK2cyto. 6His-MBP-  
880 RBOHD/C1, /C2, /C3 or 6His-MBP was incubated with 6His-GST-CRK2cyto in kinase buffer.

881

882 **Fig. 5 CRK2 modulates the ROS-production activity of RBOHD *via* phosphorylation of the C-**  
883 **terminus in HEK293T cells.**

884 **a** Effect of mutations of CRK2-dependent *in vitro* phosphorylation sites in the N-terminal cytosolic region of  
885 RBOHD. 3FLAG-RBOHD (WT, S8A or S39A) was transiently co-expressed with either 3Myc-GFP or  
886 CRK2-3Myc in HEK293T cells. After 30 min 1  $\mu$ M ionomycin was added to the medium to promote Ca<sup>2+</sup>

887 influx. Values represent mean  $\pm$ SEM of n = 3. E.V. = empty vector. The experiment was repeated three times  
888 with similar results.

889 **b** Effect of mutations in the CRK2-dependent *in vitro* phosphorylation sites in the C-terminal cytosolic  
890 region of RBOHD. 3FLAG-RBOHD (WT, S611A, S703A or S862A) were transiently co-expressed with  
891 either 3Myc-GFP or CRK2-3Myc in HEK293T cells. After 30 min 1  $\mu$ M ionomycin was added to the  
892 medium to promote Ca<sup>2+</sup> influx. Values represent mean  $\pm$ SEM of n = 3. E.V. = empty vector. The  
893 experiment was repeated three times with similar results.

894

895 **Fig. 6 RBOHD S703 is involved in regulation of flg22-induced ROS production.**

896 **a - c** Quantification of RBOHD phosphorylation in Col-0 upon flg22 treatment. 12-day-old seedlings were  
897 treated with water (-) or 1  $\mu$ M flg22 (+) for 5 min. Total proteins were digested with trypsin (S8 and S39) or  
898 Lys-C (S703) and phosphopeptides were enriched, and then selected phosphopeptides were quantified by  
899 LC-MS/MS. Box plots show MS2 fragment peak ion areas of indicated phosphopeptides (n = 4). Differences  
900 between water- or flg22-treated samples were evaluated with One-way Anova (DF = 1) with Tukey-Kramer  
901 HSD, \*\*\* p<0.001, ns, not statistically significant.

902 **a** RBOHD S8 residue (F value = 0.4745).

903 **b** RBOHD S39 residue (F value = 51.3297).

904 **c** RBOHD S703 residue (F value = 41.0851).

905 **d** flg22-induced ROS production in *RBOHDpro::3FLAG-RBOHD/rbohD* #1-3 and *RBOHDpro::3FLAG-*  
906 *RBOHD<sup>S703A</sup>/rbohD* #3-2. Leaf discs from 28-day-old plants were treated with 200 nM flg22. Box plot shows  
907 cumulative ROS production over 40 min (upper right). Values represent mean  $\pm$ SEM of n  $\geq$  23. Difference  
908 between lines was evaluated with One-way Anova (F value = 4.4509, DF = 1) with Tukey-Kramer HSD, \* p  
909 < 0.05. The experiment was repeated three times with similar results.

910

911 **Fig. 7 Phosphorylation sites in the C-terminal region are conserved in plants and animals.**

912 Phylogenetic tree showing that plant RBOHs form a single clade which is parallel to the NADPH oxidases  
913 NOX2 and NOX5 $\beta$  from *Homo sapiens*. The tree was constructed using FASTTREE from a PAGAN  
914 alignment in WASABI, 1000 bootstraps were calculated with RAxML. The full sequence alignment can be  
915 found in Wasabi at <http://was.bi?id=JauZ6q>. Plant species included were: *Arabidopsis thaliana* (At),  
916 *Capsella rubella* (Cr), *Prunus persica* (Pp), *Solanum lycopersicum* (Sl), *Aquilegia coerulea* (Ac), *Oryza sativa*  
917 (Os), *Sorghum bicolor* (Sb), *Amborella trichopoda* (Atr), and *Marchantia polymorpha* (Mp). Numbers of  
918 phospho-sites in the meme figures represent the position of the amino acid in RBOHD from *Arabidopsis*  
919 *thaliana*. Arrows indicate the position of the phospho-site (S or T) or corresponding amino acid.

920

921 **Fig. 8 Schematic model for MAMP-triggered RBOHD activation.**

922 MAMPs are recognized by MAMP receptor complexes. RBOHD N-terminus is phosphorylated by BIK1 and  
923 SIK1 and apoplastic ROS production is induced. Apoplastic ROS production by RBOHD leads to  $\text{Ca}^{2+}$   
924 influx into the cytosol.  $\text{Ca}^{2+}$ -binding to RBOHD N-terminus and to CPKs leads to  $\text{Ca}^{2+}$ -dependent activation  
925 of RBOHD. We found that CRK2 also contributes to the activation of RBOHD *via* phosphorylation of its C-  
926 terminus at S703. CRK2 can also mediate inhibition of MAPK activation and callose deposition *via* CALS  
927 after MAMP perception. MPK, mitogen-activated protein kinase; MP2K, MPKK; MP3K, MPKKK.

928

929 **Supplementary figure legends**

930 **Fig. S1 Complementation of *crk2* with *CRK2pro::CRK2-YFP*.**

931 **a** Box plot shows dry weight of 21-day-old plants (n = 10). Differences compared with Col-0 were evaluated  
932 with One-way Anova with Tukey-Kramer HSD, \*\*\* p < 0.001, ns, not statistically significant (One-way  
933 Anova, F value = 48.2539, DF = 7). The experiment was repeated three times with similar results.

934 **b** Salicylic acid accumulation level in Col-0, *crk2* and *CRK2pro::CRK2-YFP/crk2* #1-22 (n = 3). 6-day-old  
935 seedlings were used. Differences compared with Col-0 were evaluated with One-way Anova (F value =  
936 3.0476, DF = 2) with Tukey-Kramer HSD. ns, not statistically significant.

937 **c** Subcellular localization of CRK2-YFP, CRK2<sup>K353E</sup>-YFP and CRK2<sup>D450N</sup>-YFP in leaves of 7-day-old  
938 seedlings. Plasma membrane localization was confirmed using plasmolysis to visualize Hechtian strands  
939 (arrow head). Plasmolysis was induced by the application of 0.8 M mannitol. Scale bar = 25  $\mu\text{m}$ .

940

941 **Fig. S2 MAMP-triggered ROS production and molecular responses in *crk2*.**

942 **a** and **b** Box plot shows quantitative real-time RT-PCR (qPCR) analysis of *FRK1* (a) or *NHL10* (b)  
943 transcripts in Col-0, *crk2* and *fls2* after treatment with flg22 (n = 3, biological replicates). 10-day-old plants  
944 were incubated in 1  $\mu\text{M}$  flg22 solution and collected at indicated time (each time point contains 90 plants per  
945 genotype). Transcript levels were calculated by comparison with non-treated Col-0 (Time = 0).

946 **a** *FRK1* expression. Different letters indicate significant difference at p < 0.05 [One-way Anova (F value =  
947 9.4471, DF = 11) with Tukey-Kramer HSD].

948 **b** *NHL10* expression. Different letters indicate significant difference at p < 0.05 [One-way Anova (F value =  
949 9.1059, DF = 11) with Tukey-Kramer HSD].

950 **c** and **d** Chitin- or AtPep1- induced ROS production in Col-0, *crk2* and *rbohD*. Leaf discs from 28-day-old  
951 plants were treated with 200  $\mu\text{g}/\text{mL}$  chitin (c) or 1  $\mu\text{M}$  AtPep1 (d). ROS production is expressed in relative

952 luminescence units (RLU). Box plots show integration of ROS production for 40 min (upper right). The  
953 experiment was repeated three times with similar results.

954 **c** Values represent the mean  $\pm$ SEM of  $n \geq 21$ . Differences compared with Col-0 were evaluated with One-  
955 way Anova (F value = 24.1435, DF = 2) with Tukey-Kramer HSD, \*  $p < 0.05$ , \*\*\*  $p < 0.001$ .

956 **d** Values represent the mean  $\pm$ SEM of  $n = 24$ . Differences compared with Col-0 were evaluated with One-  
957 way Anova (F value = 44.5132, DF = 2) with Tukey-Kramer HSD, \*\*\*  $p < 0.001$ .

958 **e** Quantitative analysis of cytosolic  $\text{Ca}^{2+}$  changes in response to 1  $\mu\text{M}$  flg22 in 7-day-old *YCNano65* or  
959 *YCNano65/crk2* seedlings. Values represent the mean  $\pm$ SEM of  $n = 9$  (*YCNano65*) or  $n = 15$   
960 (*YCNano65/crk2*).

961 **f** Representative frame images of cytosolic  $\text{Ca}^{2+}$  change in wild type and *crk2* plants. Bar = 0.5 mm.

962 **g** MAPK activation in Col-0, *crk2* and *fls2* in response to treatment with 1  $\mu\text{M}$  flg22. 28-day-old plants (12  
963 plants per genotype). Phosphorylated MPK3 and MPK6 were detected with anti-p44/42 MPK antibody  
964 (upper panel). Proteins stained with amido black staining (lower panel). The experiment was repeated three  
965 times with similar results.

966 **h** Quantification of flg22-induced callose deposition by aniline blue ( $n \geq 16$ ) in 7-day-old seedlings with (+)  
967 or without (-) treatment with 10  $\mu\text{M}$  flg22 for 30 min. Letters indicate significant differences at  $p < 0.05$   
968 [One-way Anova (F value = 44.8732, DF = 3) with Tukey-Kramer HSD].

969 **i** Representative images of aniline blue stained leaves. Bar = 100  $\mu\text{m}$ .

970

971 **Fig. S3 CRK2 modulates the ROS-producing activity of RBOHC, D and F in HEK293T cells.**

972 **a** Expressed proteins were detected by anti-FLAG and anti-Myc antibodies (Fig. 3a). 3FLAG-RBOHD: 107  
973 kDa, CRK2-3Myc: 75.8 kDa, 3Myc-GFP: 31 kDa,  $\beta$ -actin 42 kDa. As a loading control,  $\beta$ -actin was used.  
974 Loading volume for anti-Myc antibody: 3FLAG-RBOHD + 3Myc-GFP (5  $\mu\text{L}$ ), the others (50  $\mu\text{L}$ ).

975 **b** ROS production in RBOHD-expressing HEK293T cells in  $\text{Ca}^{2+}$ -free buffer. 3FLAG-RBOHD was  
976 transiently co-expressed with either 3Myc-GFP or 3Myc-CRK2 (WT or D450N) in HEK293T cells. Values  
977 represent mean  $\pm$ SEM of  $n = 3$ . E.V. = empty vector. The experiment was repeated three times with similar  
978 results.

979 **c** Proteins expressed in HEK293T cells were detected by anti-FLAG and anti-Myc antibodies (Fig. S3b).  
980 3FLAG-RBOHD: 107 kDa, CRK2-3Myc: 75.8 kDa, 3Myc-GFP: 31 kDa,  $\beta$ -actin 42 kDa. As a loading  
981 control,  $\beta$ -actin was used. Loading volume for anti-Myc antibody: 3FLAG-RBOHD + 3Myc-GFP (5  $\mu\text{L}$ ),  
982 others (50  $\mu\text{L}$ ).

983 **d - f** ROS production of RBOHD-, RBOHC-, or RBOHF-expressing HEK293T cells. 3FLAG-RBOHD (d),  
984 3FLAG-RBOHC (e), or 3FLAG-RBOHF (f) was transiently co-expressed with 3Myc-GFP or CRK2-3Myc  
985 in HEK293T cells, respectively. After 20 min of base line measurement, 1  $\mu$ M ionomycin was added to the  
986 medium. Values represent mean  $\pm$ SEM of n = 3. The experiment was repeated two times with similar results.

987 **g** Proteins expressed in HEK293T cells were detected by anti-FLAG and anti-Myc antibodies (Fig. S3d-f).  
988 3FLAG-RBOHD: 107 kDa, 3FLAG-RBOHC, 106 kDa, 3FLAG-RBOHF: 111 kDa, CRK2-3Myc: 75.8 kDa,  
989 3Myc-GFP: 31 kDa,  $\beta$ -actin 42 kDa. As a loading control,  $\beta$ -actin was used. Loading volume for anti-Myc  
990 antibody: 3FLAG-RBOHs + 3Myc-GFP (5  $\mu$ L), 3FLAG-RBOHs + CRK2-3Myc (50  $\mu$ L).

991

992 **Fig. S4 ROS production activity of RBOHD S703A and S862A in HEK293T cells.**

993 **a and b** Proteins expressed in HEK293T cells were detected by anti-FLAG and anti-Myc antibodies (Fig. 5a  
994 and 5b). 3FLAG-RBOHD: 107 kDa, CRK2-3Myc: 75.8 kDa, 3Myc-GFP: 31 kDa,  $\beta$ -actin 42 kDa. As a  
995 loading control,  $\beta$ -actin was used. Loading volume for anti-Myc antibody: 3FLAG-RBOHD + 3Myc-GFP (5  
996  $\mu$ L), others (50  $\mu$ L).

997 **a** 3FLAG-RBOHD (WT, S8A or S39A) was transiently co-expressed with either 3Myc-GFP or CRK2-3Myc  
998 into HEK293T cells (Fig. 5a).

999 **b** 3FLAG-RBOHD (WT, S611A, S703A or S862A) was transiently co-expressed with either 3Myc-GFP or  
1000 CRK2-3Myc into HEK293T cells (Fig. 5b).

1001 **c and d** ROS production of RBOHD-expressing HEK293T cells. After 30 min 1  $\mu$ M ionomycin was added to  
1002 the medium. Values represent mean  $\pm$ SEM of n = 3. E.V. = empty vector. The experiment was repeated three  
1003 times with similar results.

1004 **c** 3FLAG-RBOHD (WT or S703A) was transiently co-expressed with either 3Myc-GFP or CRK2-3Myc into  
1005 HEK293T cells. The right upper panel is the enlargement of ionomycin-induced transient ROS production of  
1006 3FLAG-RBOHD (WT or S703A) and 3Myc-GFP co-expressing cells (dashed box).

1007 **d** 3FLAG-RBOHD (WT or S862A) was transiently co-expressed with either 3Myc-GFP or CRK2-3Myc into  
1008 HEK293T cells.

1009

1010 **Fig. S5 Quantification of RBOHD and MPK phosphorylation in Col-0 upon flg22 treatment.**

1011 12-day-old Col-0 seedlings were treated with water (-) or 1  $\mu$ M flg22 (+) for 5 min. Total proteins were  
1012 digested by trypsin for peptides from RBOHD N-terminal region and MPKs, by Lys-C for RBOHD S703  
1013 peptide. Peptides were enriched, and then selected phosphopeptides were quantified by LC-MS/MS. Box  
1014 plots show MS2 fragment peak ion areas of indicated phosphopeptides (n = 4). Differences between water-

1015 or flg22-treated samples were evaluated with One-way Anova (DF = 1) with Tukey-Kramer HSD, \* P<0.05,  
1016 \*\* P<0.01, \*\*\* p<0.001, ns, not statistically significant.

1017 **a** and **b** RBOHD S8 residue [F value = 9.3550 (a), F value = 1.7274 (b)].

1018 **c** RBOHD S39 residue (F value = 51.1741).

1019 **d** RBOHD S703 residue (F value = 87.8835).

1020 **e** RBOHD S163 residue (F value = 71.8320).

1021 **f** RBOHD S347 residue (F value = 22.8032).

1022 **g** RBOHD S343 and S347 residues (F value = 10.9184).

1023 **h** MPK3 TEY motif (F value = 8.0906).

1024 **i** MPK6 TEY motif (F value = 33.9863).

1025 **j** MPK11 TEY motif (F value = 11.6362).

1026

1027 **Fig. S6 RBOHD S703 is involved in regulation of flg22-induced ROS production.**

1028 **a** Representative pictures of 21-day-old plants of *RBOHDpro::3FLAG-RBOHD/rbohD* #1-3 and  
1029 *RBOHDpro::3FLAG-RBOHD<sup>S703A</sup>/rbohD* #3-2 plants. Bar = 1 cm.

1030 **b** Expressed proteins in *RBOHDpro::3FLAG-RBOHD/rbohD* #1-3 and *RBOHDpro::3FLAG-*  
1031 *RBOHD<sup>S703A</sup>/rbohD* #3-2. 3FLAG-RBOHD was detected by anti-FLAG antibody. Input proteins stained with  
1032 amido black staining (lower panel).

1033 **c** flg22-induced ROS production in *RBOHDpro::3FLAG-RBOHD/rbohD* #11-1 and *RBOHDpro::3FLAG-*  
1034 *RBOHD<sup>S703A</sup>/rbohD* #1-4. Leaf discs from 28-day-old plants were treated with 200 nM flg22. Box plots show  
1035 integration of ROS production for 40 min (upper right). Values represent the mean  $\pm$ SEM of n = 24.  
1036 Difference between lines was evaluated with One-way Anova (F value = 15.4533, DF = 1) with Tukey-  
1037 Kramer HSD, \*\*\* p < 0.001.

1038

1039 **Fig. S7 Reduced ROS production in *crk2* is not due to lower expression of *BIK1*.**

1040 Box plot shows quantitative real-time RT-PCR (qPCR) analysis of *BIK1* transcripts in Col-0, *crk2* and *fls2*  
1041 after treatment with flg22 (n = 3, biological replicates). 10-day-old plants were incubated in 1  $\mu$ M flg22  
1042 solution and collected at indicated time (each time point contains 90 plants per genotype). Transcript levels  
1043 were calculated by comparison with non-treated Col-0 (Time = 0). Different letters indicate significant  
1044 difference at p < 0.05 [One-way Anova (F value = 220.6240, DF = 8) with Tukey-Kramer HSD].



1045 **Supplementary table legends**

1046 **Table S1. *In vitro* phosphorylation sites of 6His-MBP-RBOHDcyto by 6His-GST-CRK2cyto**

1047 The 6His-MBP-RBOHD cytosolic regions were incubated with 6His-GST-CRK2cyto. The 6His-MBP-  
1048 RBOHDcyto bands were excised from a SDS polyacrylamide gel and subsequently digested by trypsin or Lys-C.  
1049 The peptides were analyzed by LC-MS/MS. Phosphorylated peptides are designated as pS.

1050 **Table S2. Progeny of *CRK2/crk2 BIK1/bik1* parent and *CRK2/crk2 bik1/bik1* parent**

1051 The genotypes of F2 and F3 progenies were determined by PCR. Observed, the number of individuals observed;  
1052 Expected, the expected number based on Mendelian inheritance. Chi-square test was used to determine the  
1053 probability (P) of which the deviation of the observed value from the expected value was due to chance.

1054 **Table S3. Primer sequences**

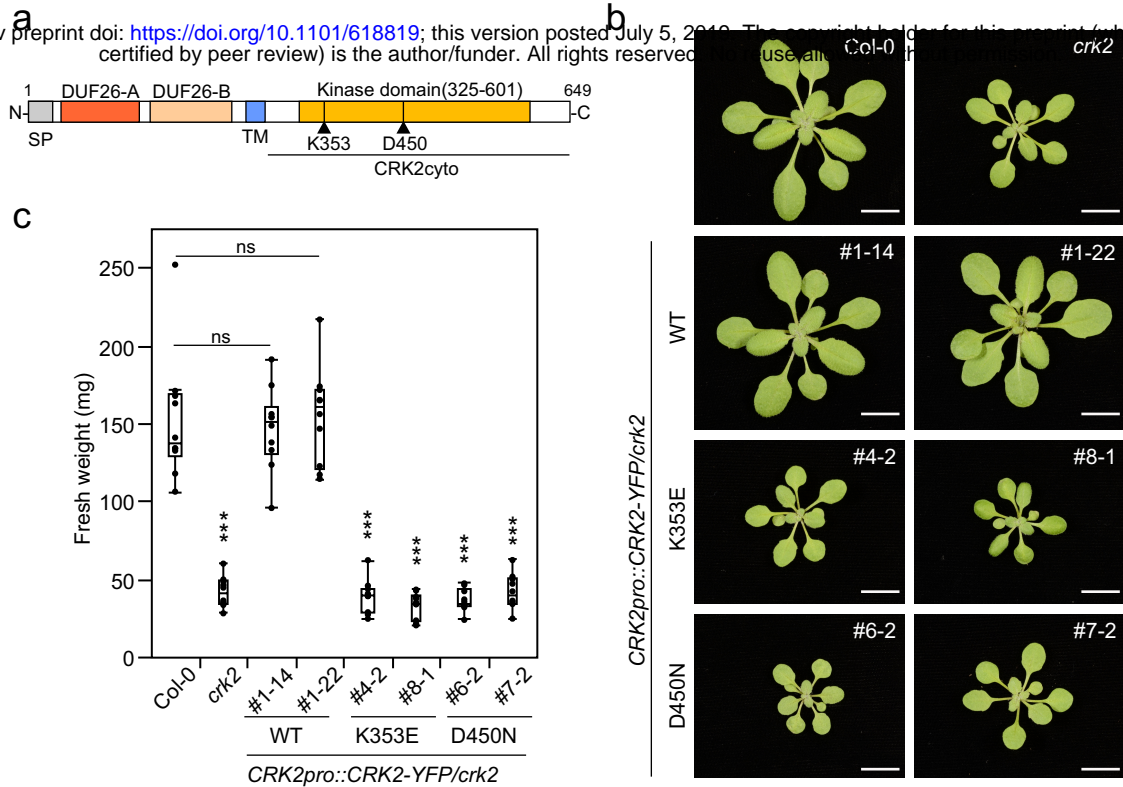

**Fig. 1 CRK2 kinase activity is required for plant growth.**

**a** Schematic representation of CRK2 structure. SP: signal peptide (AAs 1-29), DUF26-A (AAs 39-132), DUF26-B (AAs 146-243), TM: transmembrane domain (AAs 261-283), and kinase domain (AAs 325-601).

**b** Representative pictures of 21-day-old plants of Col-0, *crk2*, *CRK2pro::CRK2-YFP/crk2*, *CRK2pro::CRK2<sup>K353E</sup>-YFP/crk2* and *CRK2pro::CRK2<sup>D450N</sup>-YFP/crk2* plants. Bar = 1 cm.

**c** Box plot shows the fresh weight of 21-day-old plants (n = 10). Differences between Col-0 and transgenic lines were evaluated with One-way Anova with Tukey-Kramer HSD, \*\*\* p < 0.001, ns, not statistically significant (Oneway Anova, F value = 71.5559, DF = 7). The experiment was repeated three times with similar results.

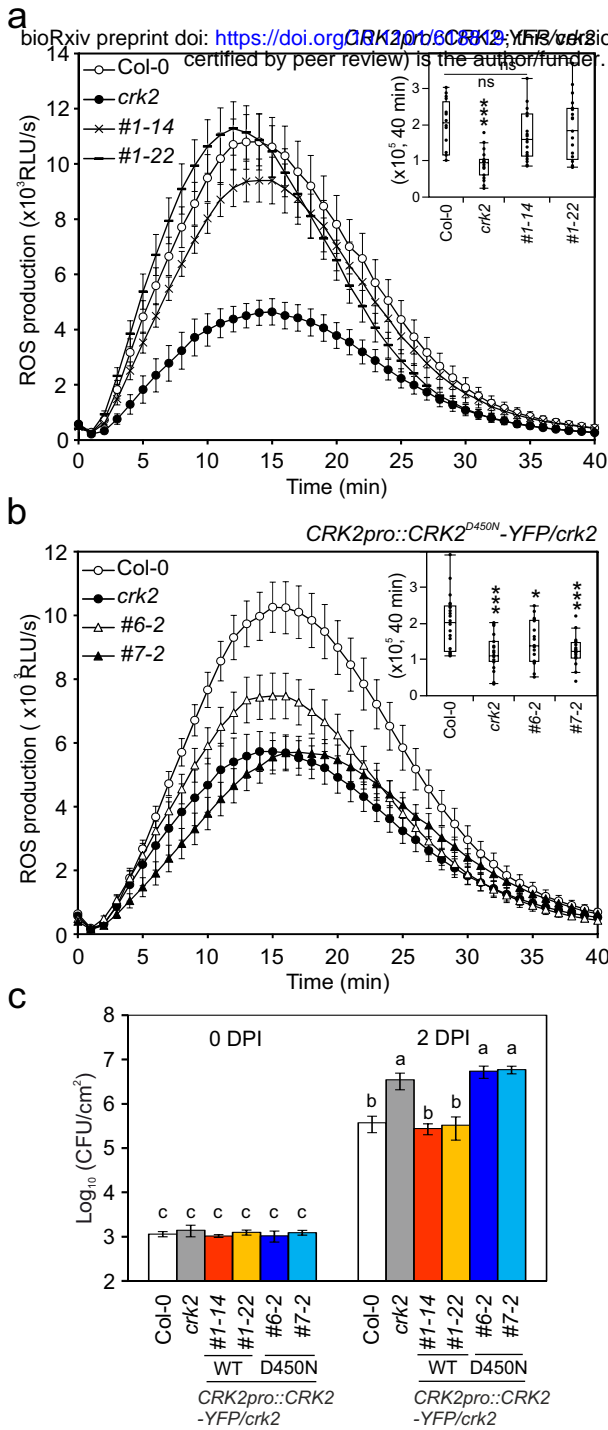

**Fig. 2 CRK2 regulates flg22-triggered ROS production and resistance to a virulent bacterial pathogen.**

**a** and **b** flg22-induced ROS production in Col-0, *crk2* and *CRK2pro::CRK2-YFP/crk2* or *CRK2pro::CRK2<sup>D450N</sup>-YFP/crk2*. Leaf discs from 28-day-old plants were treated with 200 nM flg22 and ROS production was measured. Box plot shows cumulative ROS production over 40 min (upper right).

**a** Values represent mean  $\pm$ SEM of  $n \geq 16$ . Differences compared with Col-0 were evaluated with One-way Anova (F value = 9.2282, DF = 3) with Tukey-Kramer HSD, \*\*\*  $p < 0.001$ , ns, not statistically significant.

**b** Values represent the mean  $\pm$ SEM of  $n \geq 19$ . Differences compared with Col-0 were evaluated with One-way Anova (F value = 8.8777, DF = 3) with Tukey-Kramer HSD, \*  $p < 0.05$ , \*\*\*  $p < 0.001$ .

**c** Quantitative analysis of bacterial growth in Col-0, *crk2* and *CRK2pro::CRK2-YFP/crk2* or *CRK2pro::CRK2<sup>D450N</sup>-YFP/crk2* following syringe infiltration with *Pto* DC3000 ( $1 \times 10^5$  CFU/mL). Values represent mean  $\pm$ SD of  $n = 3$  (0 DPI) or  $n = 6$  (2 DPI). Letters indicate significant differences at  $p < 0.05$  [One-way Anova (F value = 566.5661, DF = 11) with Tukey-Kramer HSD]. **a - c** The experiment was repeated three times with similar results.

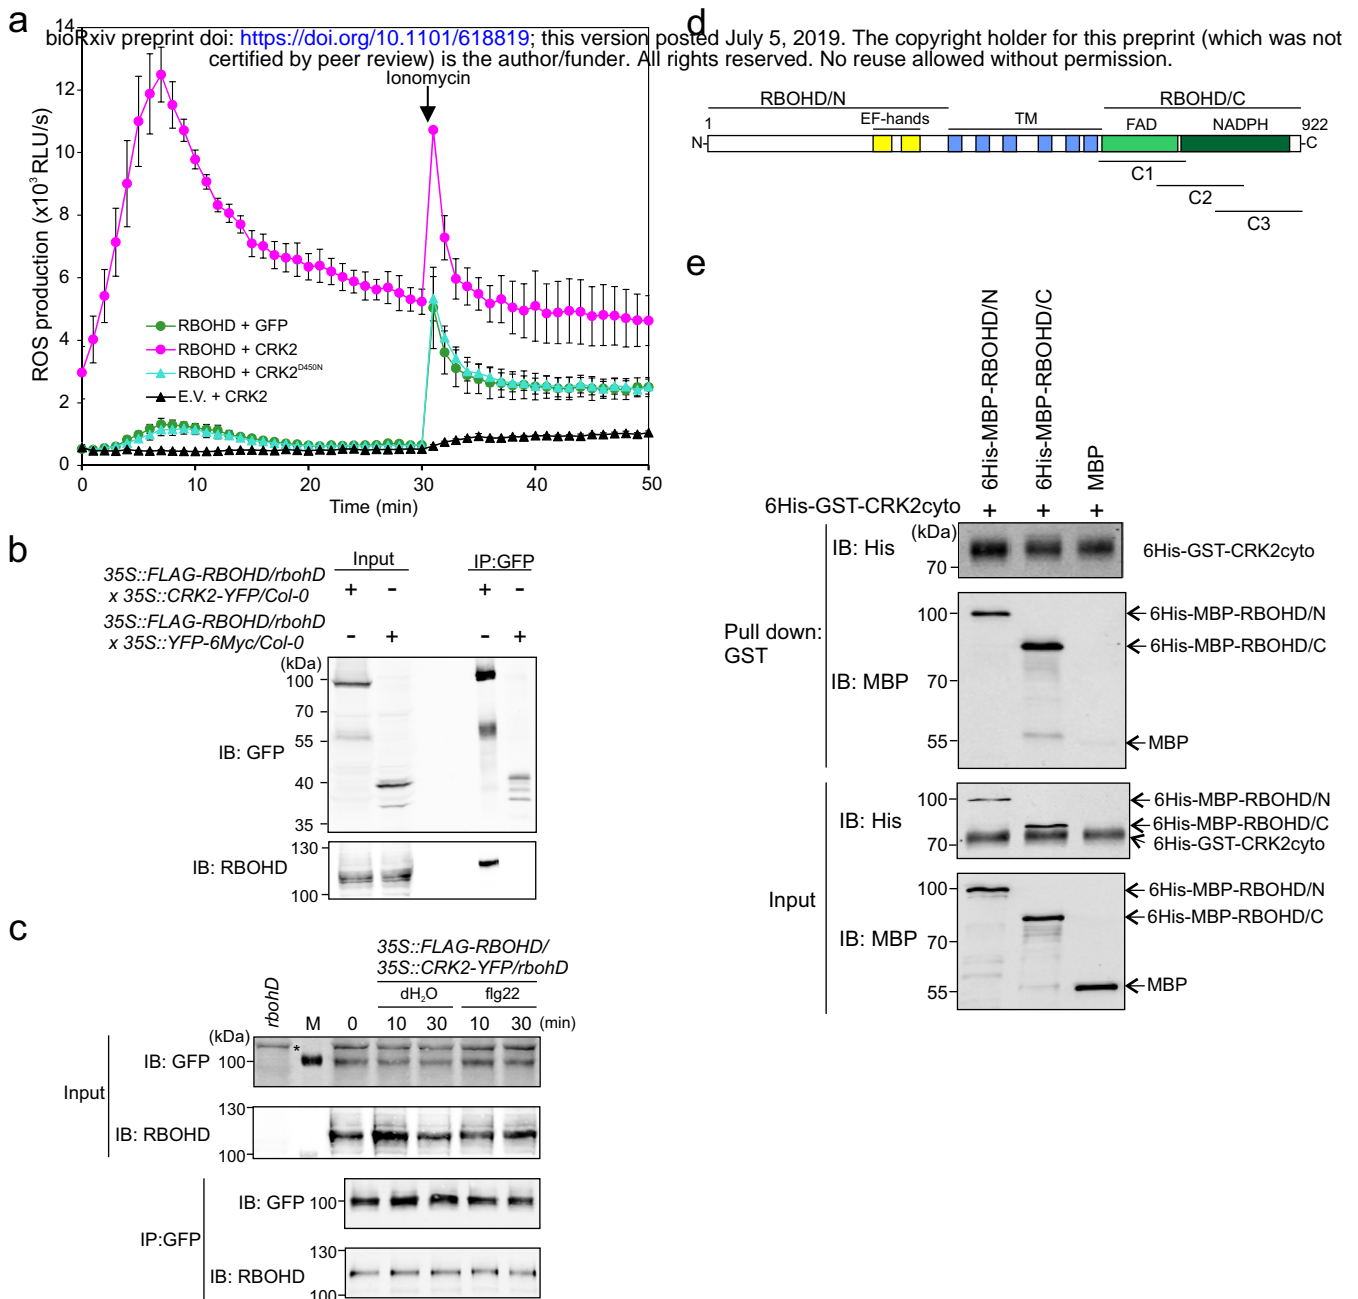

### Fig. 3 CRK2 interacts with RBOHD.

**a** ROS production of RBOHD-expressing HEK293T cells. 3FLAG-RBOHD was transiently co-expressed with either 3Myc-GFP or CRK2 (WT or D450N)-3Myc. After 30 min 1  $\mu$ M ionomycin was added to the medium. Values represent mean  $\pm$  SEM of  $n = 3$ . E.V. = empty vector. The experiment was repeated three times with similar results.

**b** and **c** Co-IP analysis of interaction between RBOHD and CRK2. CRK2-YFP was immuno-precipitated using anti-GFP beads followed by immunoblotting with anti-RBOHD and anti-GFP antibodies. FLAG-RBOHD: 105 kDa, CRK2-YFP: 99.9 kDa and YFP-6Myc: 36.7 kDa.

**b** 35S::FLAG-RBOHD/*rbohD* x 35S::CRK2-YFP/*Col-0* (F1) and 35S::FLAG-RBOHD/*rbohD* x 35S::YFP-6Myc/*Col-0* (F1) plants. The experiment was repeated three times with similar results.

**c** 35S::FLAG-RBOHD/35S::CRK2-YFP/*rbohD* plants with 1  $\mu$ M flg22 treatment. M: Protein molecular marker, \*: unspecific signal. Total protein from *rbohD* was used for immunoblot of input as a negative control.

**d** Schematic representation of RBOHD structure. EF-hands (AAs 257-329), TM: transmembrane domains (AAs 374-605), FAD: FAD-binding domain (AAs 613-730), NADPH: NADPH-binding domain (AAs 736-904), RBOHD/N: RBOHD N-terminal region (AAs 1-376), RBOHD/C: RBOHD C-terminal region (AAs 606-922); C1: RBOHD/C1 (AAs 606-741), C2: RBOHD/C2 (AAs 696-831), C3: RBOHD/C3 (AAs 787-922).

**e** *In vitro* pull-down analysis of direct interaction between RBOHD and CRK2. MBP, 6His-MBP-RBOHD/N and 6His-MBP-RBOHD/C were incubated with 6His-GST-CRK2cyto and pull down with GST followed by immunoblotting with anti-6His and anti-MBP antibodies. 6His-GST-CRK2cyto: 68.5 kDa, 6His-MBP-RBOHD/N: 84.7 kDa, 6His-MBP-RBOHD/C: 78.4 kDa, MBP: 50.8 kDa. The experiment was repeated two times with similar results.

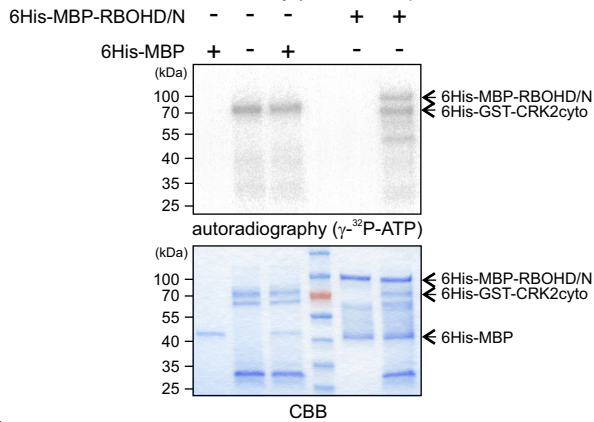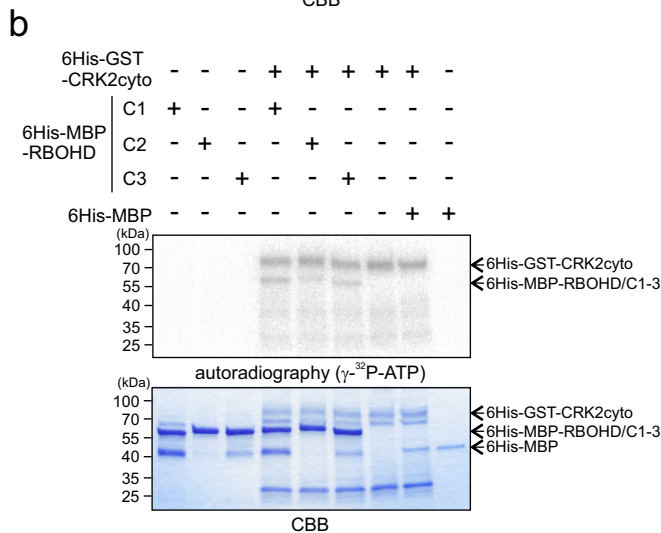

**Fig. 4 CRK2 phosphorylates the cytosolic regions of RBOHD *in vitro*.**

**a** and **b** Autophosphorylation and transphosphorylation were visualized with [ $\gamma$ -<sup>32</sup>P] ATP and autoradiography (upper panel). Input proteins were stained with coomassie brilliant blue (CBB) (lower panel). Experiments were repeated three times with similar results. 6His-GST-CRK2cyto: 68.5 kDa, 6His-MBP-RBOHD/N: 84.7 kDa, 6His-MBP-RBOHD/C1:57.9 kDa, /C2:57.8 kDa, /C3:58.4 kDa, 6His-MBP: 44.3 kDa.

**a** *In vitro* transphosphorylation of 6His-MBP-RBOHD N-terminus by 6His-GST-CRK2cyto. 6His-MBP-RBOHD/N or 6His-MBP was incubated with 6His-GST-CRK2cyto in kinase buffer.

**b** *In vitro* transphosphorylation of 6His-MBP-RBOHD C-terminus by 6His-GST-CRK2cyto. 6His-MBP-RBOHD/C1, /C2, /C3 or 6His-MBP was incubated with 6His-GST-CRK2cyto in kinase buffer.

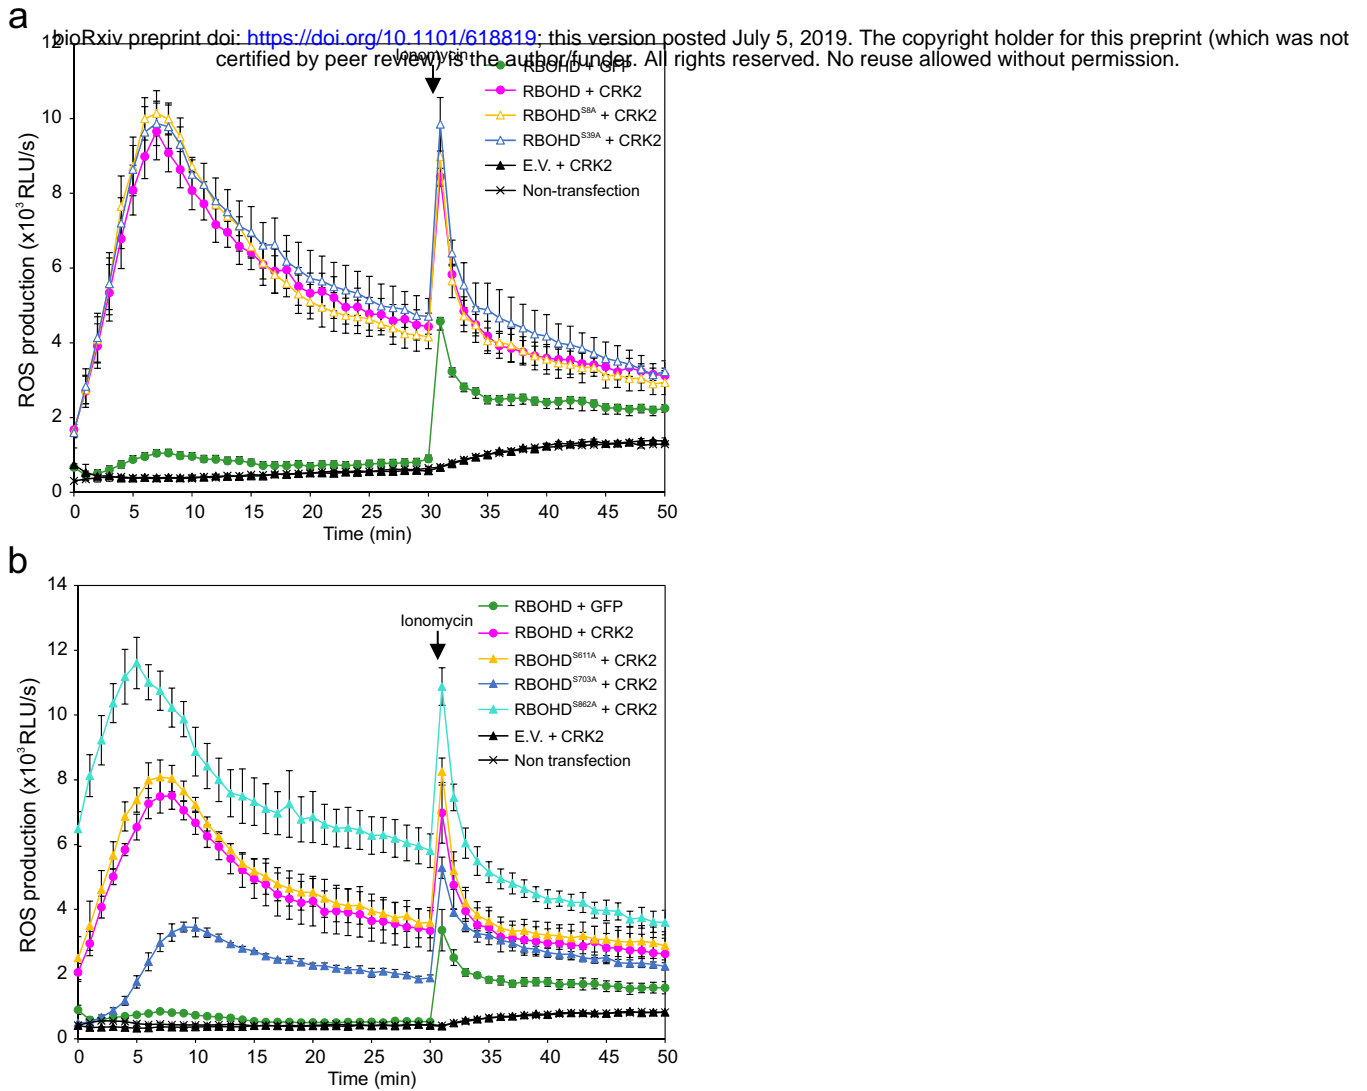

**Fig. 5 CRK2 modulates the ROS-production activity of RBOHD *via* phosphorylation of the C-terminus in HEK293T cells.**

**a** Effect of mutations of CRK2-dependent *in vitro* phosphorylation sites in the N-terminal cytosolic region of RBOHD. 3FLAG-RBOHD (WT, S8A or S39A) was transiently co-expressed with either 3Myc-GFP or CRK2-3Myc in HEK293T cells. After 30 min 1  $\mu$ M ionomycin was added to the medium to promote  $\text{Ca}^{2+}$  influx. Values represent mean  $\pm$ SEM of  $n = 3$ . E.V. = empty vector. The experiment was repeated three times with similar results.

**b** Effect of mutations in the CRK2-dependent *in vitro* phosphorylation sites in the C-terminal cytosolic region of RBOHD. 3FLAG-RBOHD (WT, S611A, S703A or S862A) were transiently co-expressed with either 3Myc-GFP or CRK2-3Myc in HEK293T cells. After 30 min 1  $\mu$ M ionomycin was added to the medium to promote  $\text{Ca}^{2+}$  influx. Values represent mean  $\pm$ SEM of  $n = 3$ . E.V. = empty vector. The experiment was repeated three times with similar results.



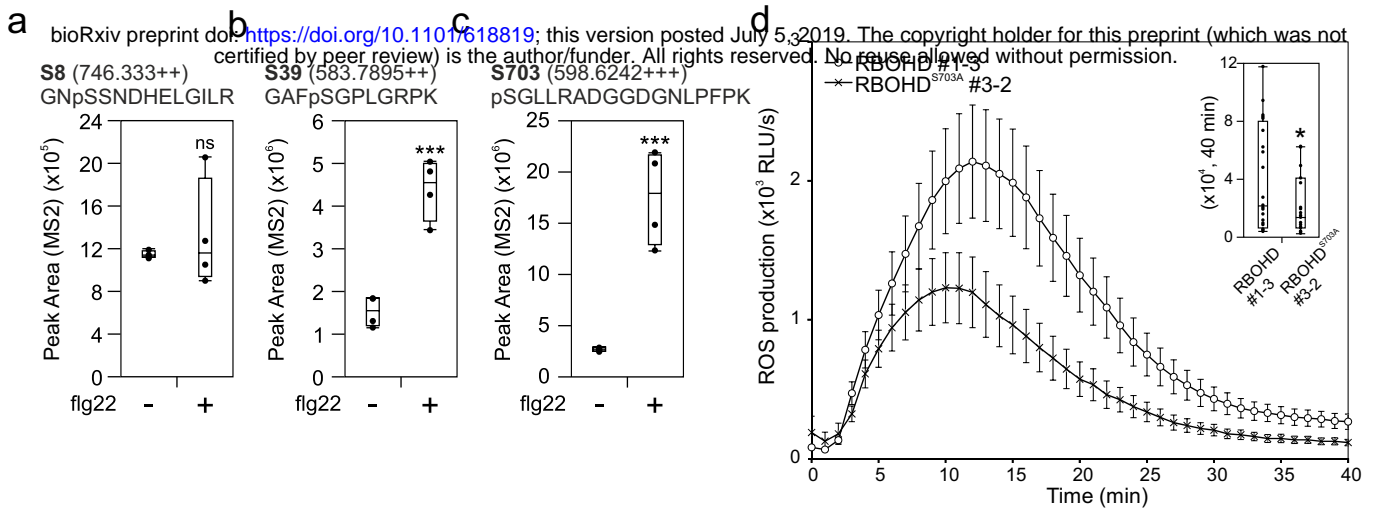

**Fig. 6 RBOHD S703 is involved in regulation of flg22-induced ROS production.**

**a - c** Quantification of RBOHD phosphorylation in Col-0 upon flg22 treatment. 12-day-old seedlings were treated with water (-) or 1  $\mu$ M flg22 (+) for 5 min. Total proteins were digested with trypsin (S8 and S39) or Lys-C (S703) and phosphopeptides were enriched, and then selected phosphopeptides were quantified by LC-MS/MS. Box plots show MS2 fragment peak ion areas of indicated phosphopeptides ( $n = 4$ ). Differences between water- or flg22-treated samples were evaluated with One-way Anova (DF = 1) with Tukey-Kramer HSD, \*\*\*  $p < 0.001$ , ns, not statistically significant.

**a** RBOHD S8 residue (F value = 0.4745).

**b** RBOHD S39 residue (F value = 51.3297).

**c** RBOHD S703 residue (F value = 41.0851).

**d** flg22-induced ROS production in *RBOHDpro::3FLAG-RBOHD/rbohD* #1-3 and *RBOHDpro::3FLAG-RBOHD<sup>S703A</sup>/rbohD* #3-2. Leaf discs from 28-day-old plants were treated with 200 nM flg22. Box plot shows cumulative ROS production over 40 min (upper right). Values represent mean  $\pm$  SEM of  $n \geq 23$ . Difference between lines was evaluated with One-way Anova (F value = 4.4509, DF = 1) with Tukey-Kramer HSD, \*  $p < 0.05$ . The experiment was repeated three times with similar results.

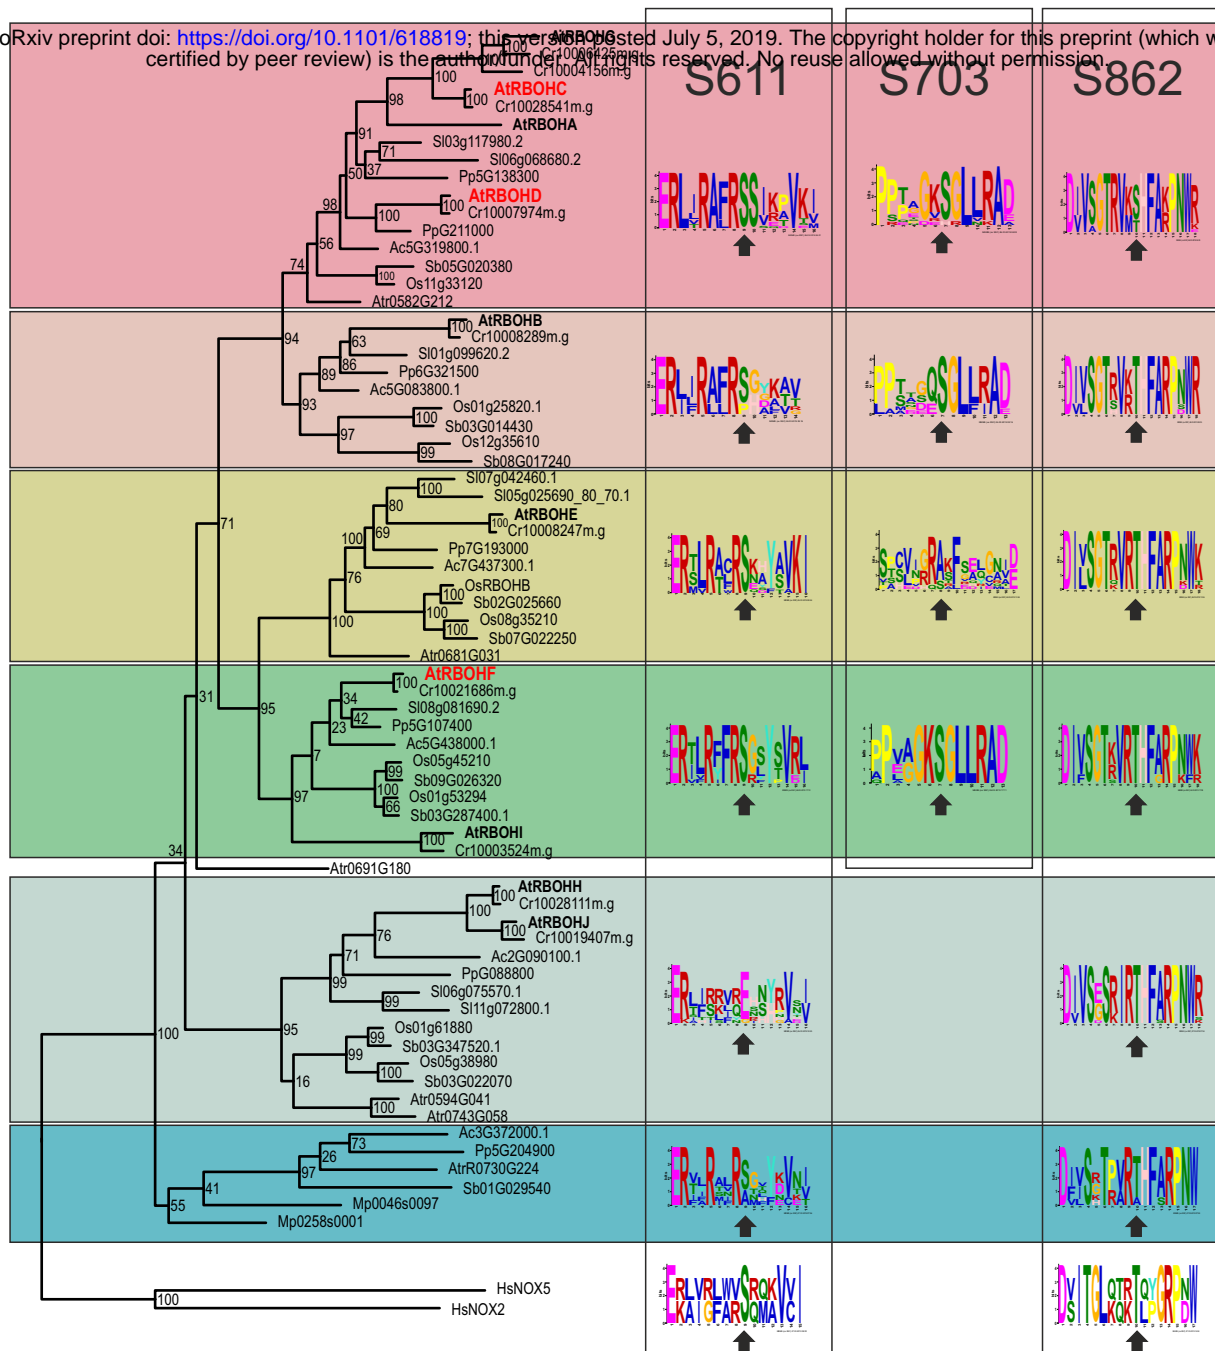

**Fig. 7 Phosphorylation sites in the C-terminal region are conserved in plants and animals.**

Phylogenetic tree showing that plant RBOHs form a single clade which is parallel to the NADPH oxidases NOX2 and NOX5 $\beta$  from *Homo sapiens*. The tree was constructed using FASTTREE from a PAGAN alignment in WASABI, 1000 bootstraps were calculated with RAXML. The full sequence alignment can be found in Wasabi at <http://was.bi?id=JauZ6q>. Plant species included were: *Arabidopsis thaliana* (At), *Capsella rubella* (Cr), *Prunus persica* (Pp), *Solanum lycopersicum* (Sl), *Aquilegia coerulea* (Ac), *Oryza sativa* (Os), *Sorghum bicolor* (Sb), *Amborella trichopoda* (Atr), and *Marchantia polymorpha* (Mp). Numbers of phospho-sites in the meme figures represent the position of the amino acid in RBOHD from *Arabidopsis thaliana*. Arrows indicate the position of the phospho-site (S or T) or corresponding amino acid.

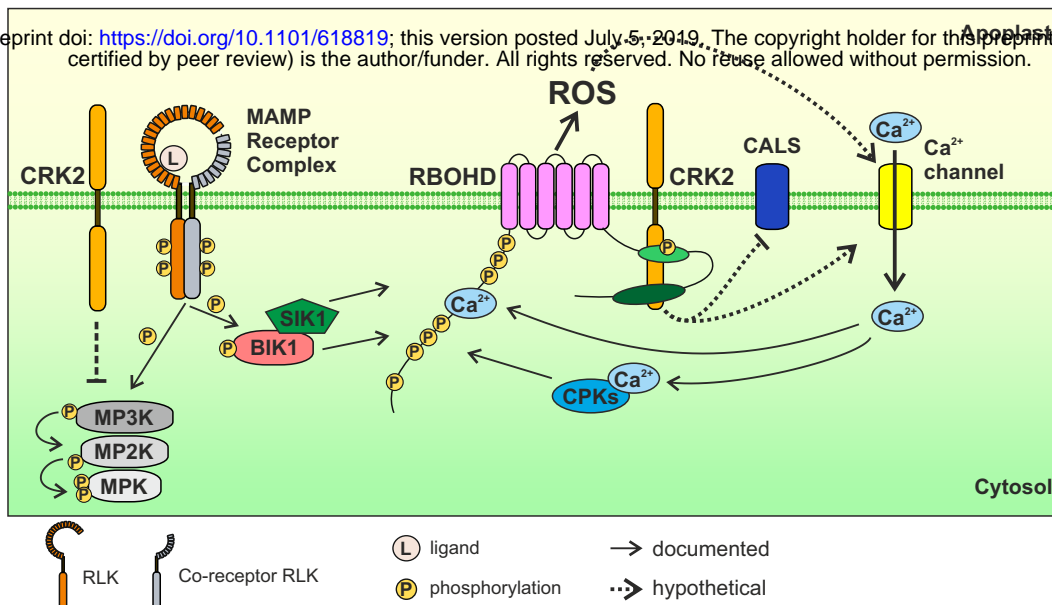

**Fig. 8 Schematic model for MAMP-triggered RBOHD activation.**

MAMPs are recognized by MAMP receptor complexes. RBOHD N-terminus is phosphorylated by BIK1 and SIK1 and apoplastic ROS production is induced. Apoplastic ROS production by RBOHD leads to Ca<sup>2+</sup> influx into the cytosol. Ca<sup>2+</sup>-binding to RBOHD N-terminus and to CPKs leads to Ca<sup>2+</sup>-dependent activation of RBOHD. We found that CRK2 also contributes to the activation of RBOHD *via* phosphorylation of its C-terminus at S703. CRK2 can also mediate inhibition of MAPK activation and callose deposition *via* CALS after MAMP perception. MPK, mitogen-activated protein kinase; MP2K, MPKK; MP3K, MPKKK.
